# Supplementary material for: Sequence- and Structure-Based Functional Annotation and Assessment of Metabolic Transporters inAspergillus oryzae: A Representative Case Study
Source: Hindawi journal article supplement (doi:10.1155/2016/8124636), 2016-01-01
Supplement: f1 [file 8124636.f1.pdf]

## Supporting Information

### Sequence- and Structure-Based Functional Annotation and Assessment of Metabolic Transporters in *Aspergillus oryzae*:

#### A Representative Case Study

Nachon Raethong<sup>1</sup>, Jirasak Wong-ekkabut<sup>2,3</sup>, Kobkul Laoteng<sup>4</sup>, and Wanwipa Vongsangnak<sup>1,3\*</sup>

<sup>1</sup>Department of Zoology, Faculty of Science, Kasetsart University, Bangkok, Thailand

<sup>2</sup>Department of Physics, Faculty of Science, Kasetsart University, Bangkok, Thailand

<sup>3</sup>Computational Biomodelling Laboratory for Agricultural Science and Technology (CBLAST), Faculty of Science, Kasetsart University, Bangkok, Thailand

<sup>4</sup>Food Biotechnology Research Unit, National Center for Genetic Engineering and Biotechnology (BIOTEC), National Science and Technology Development Agency (NSTDA), Pathum Thani, Thailand

\*Correspondence should be addressed to Wanwipa Vongsangnak; wanwipa.v@ku.ac.th

## Contents

|                                                                                                                                                                                              |    |
|----------------------------------------------------------------------------------------------------------------------------------------------------------------------------------------------|----|
| <b>Figure S1.</b> Horizontal cladogram of evolutionary relationship among MAGT1, OST3, and AO090001000747 gene.....                                                                          | 2  |
| <b>Figure S2.</b> Overall structure-based sequence alignment between the <i>A. oryzae</i> and <i>N. crassa</i> H <sup>+</sup> -ATPases .....                                                 | 4  |
| <b>Figure S3.</b> Comparable RMSD variations of global structures between <i>A. oryzae</i> and <i>N. crassa</i> H <sup>+</sup> -ATPases on simulation time.....                              | 5  |
| <b>Figure S4.</b> Initial snapshot of the MD simulation of M-domain of <i>A. oryzae</i> H <sup>+</sup> -ATPase integrated in palmitoyl oleoylphos phatidylcholine (POPC) lipid bilayer ..... | 6  |
| <b>Figure S5.</b> The RMSD of M-domain of <i>A. oryzae</i> H <sup>+</sup> -ATPase integrated in palmitoyl oleoylphos phatidylcholine (POPC) lipid bilayer .....                              | 7  |
| <b>Table S1.</b> List of 123 candidate transporter genes with predicted functions from TCDB and TransportDB .....                                                                            | 8  |
| <b>Table S2.</b> List of 123 candidate transporter genes with assigned K numbers and KEGG orthology definition .....                                                                         | 15 |
| <b>Table S3.</b> List of 65 transporter genes and functions involved in <i>A. oryzae</i> metabolism .....                                                                                    | 19 |
| <b>Table S4.</b> List of 65 transporter genes with curated functions from integrative databases of TCDB, KEGG, and PFAM .....                                                                | 21 |
| <b>Table S5.</b> List of top 10 identified templates for <i>A. oryzae</i> H <sup>+</sup> -ATPase encoded by AO090005000842 gene .....                                                        | 23 |
| <b>Table S6.</b> List of conserved catalytic domains between the <i>A. oryzae</i> and <i>N. crassa</i> H <sup>+</sup> -ATPases with percentage of identity .....                             | 24 |
| <b>Table S7.</b> List of average RMSD over the equilibrium of five principal regions in <i>A. oryzae</i> and <i>N. crassa</i> H <sup>+</sup> -ATPases .....                                  | 25 |
| <b>Table S8.</b> Comparable RMSF between <i>A. oryzae</i> and <i>N. crassa</i> H <sup>+</sup> -ATPases .....                                                                                 | 26 |

**Figure S1.** Horizontal cladogram of evolutionary relationship among MAGT1, OST3, and AO090001000747 gene

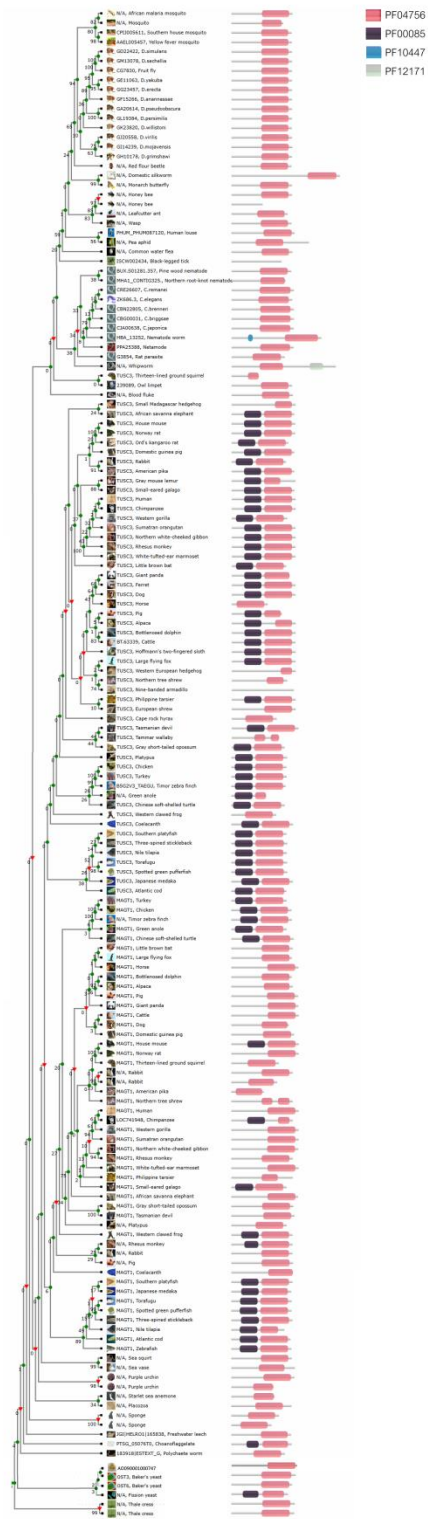

**Figure S2.** Overall structure-based sequence alignment between the *A. oryzae* and *N. crassa* H<sup>+</sup>-ATPases

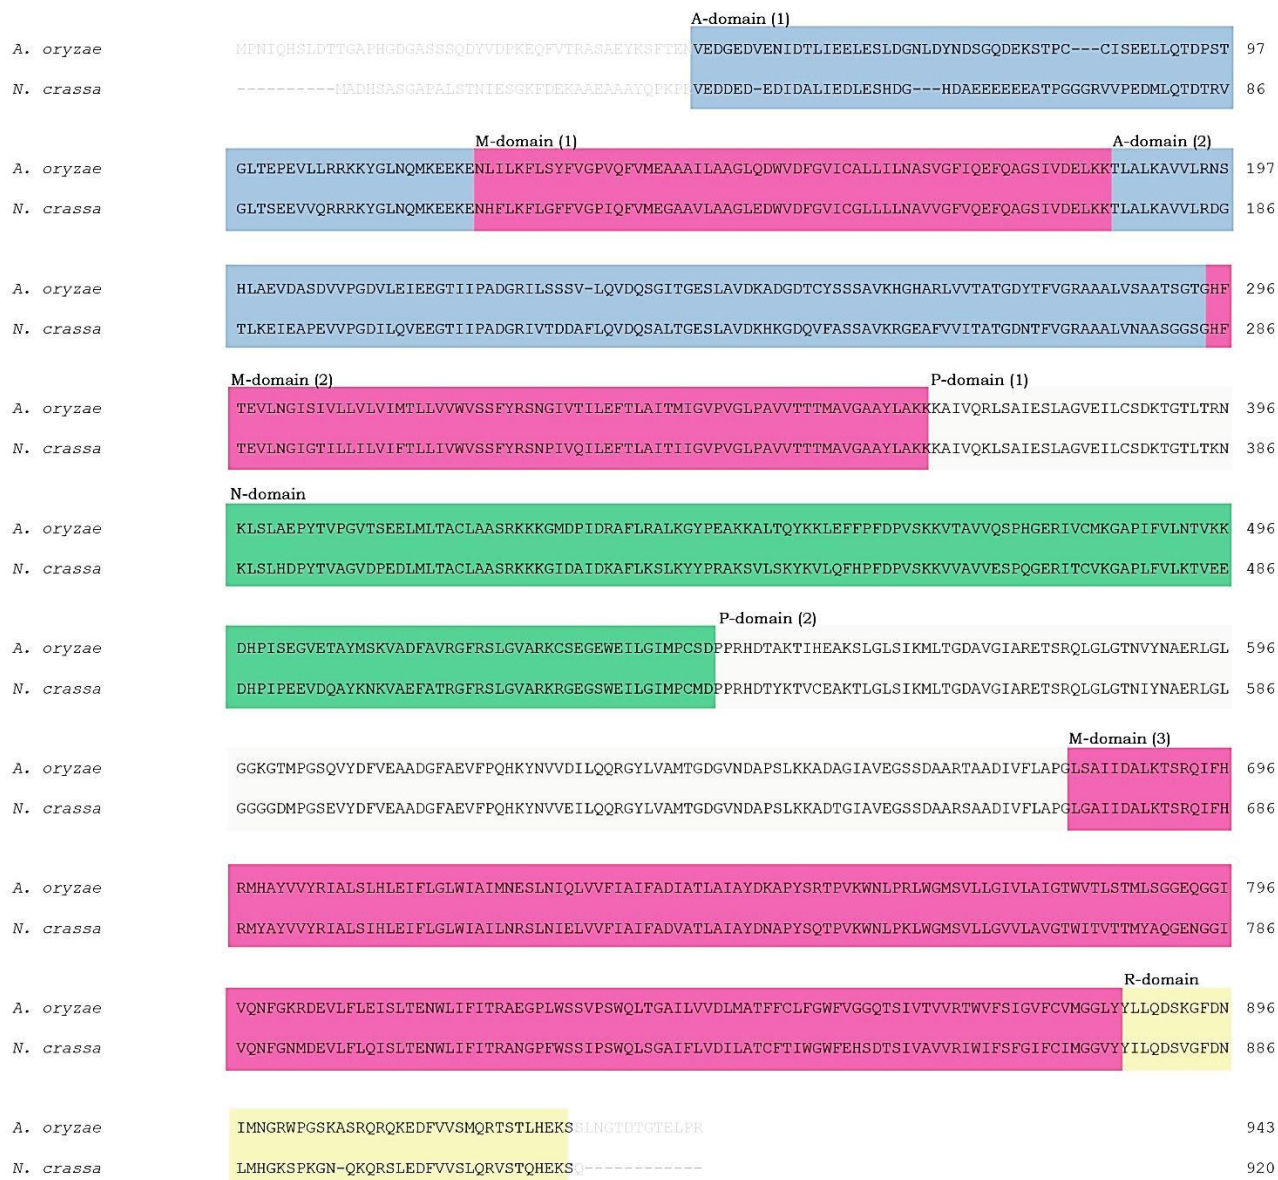

**Figure S3.** Comparable RMSD variations of global structures between *A. oryzae* and *N. crassa* H<sup>+</sup>-ATPases on simulation time

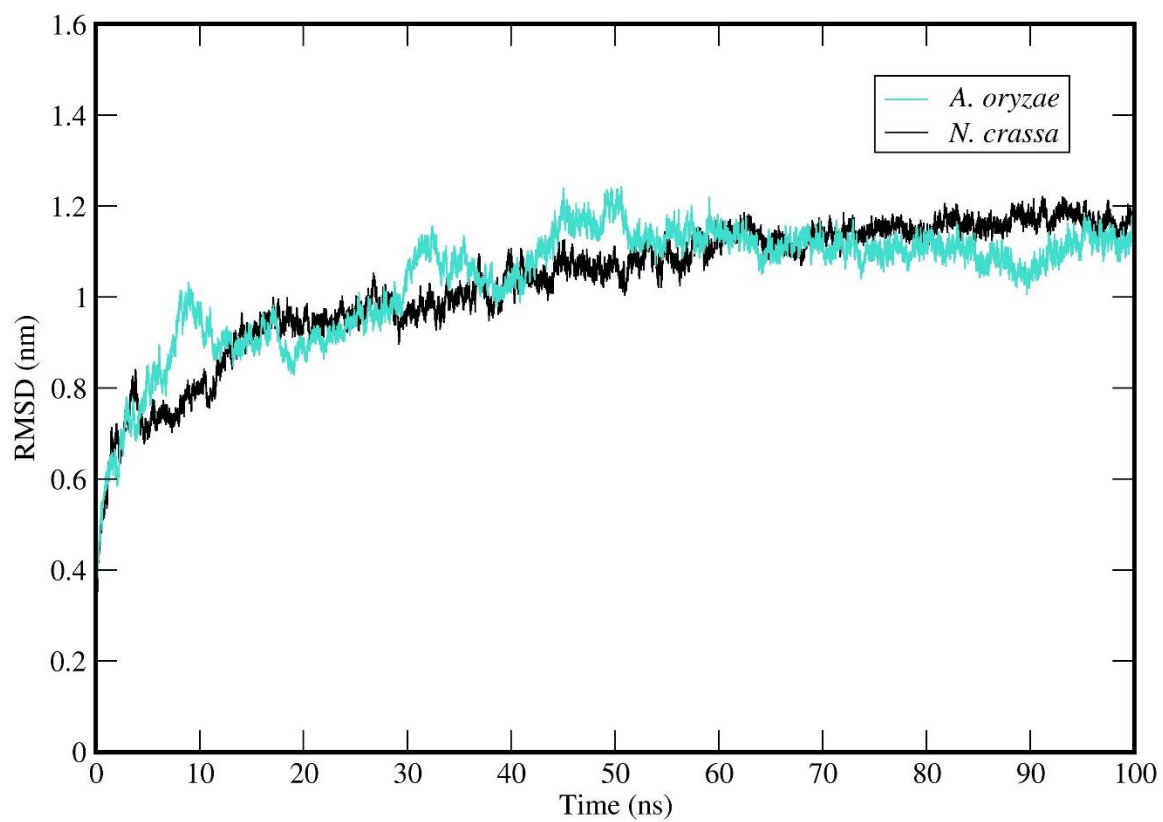

**Figure S4.** Initial snapshot of the MD simulation of M-domain of *A. oryzae* H<sup>+</sup>-ATPase integrated in palmitoyl oleoylphos phatidylcholine (POPC) lipid bilayer

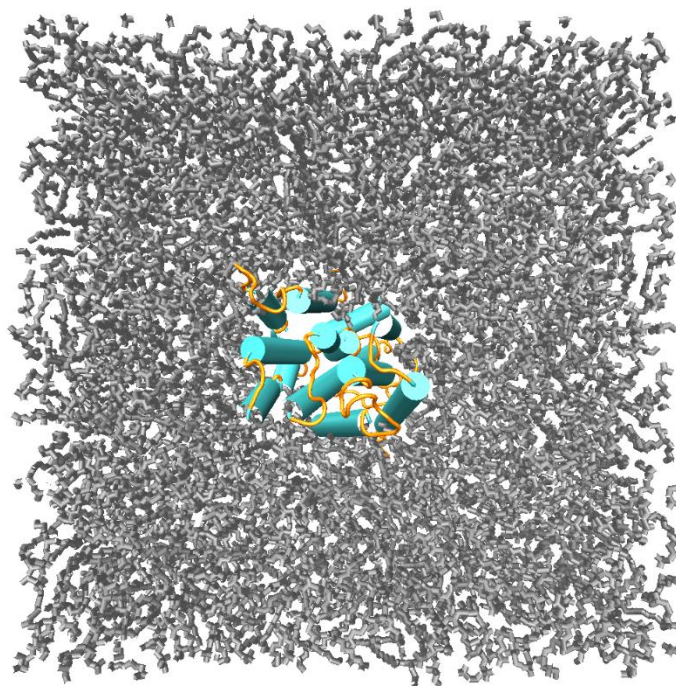

**Note:** The simulation system consisted of 349 residues of the protein, 477 POPC lipids, 55,570 water molecules and 2 potassium ions. The total number of atoms was 194,970 in the system with box dimensions of 12.86 x 12.86 x 14.98 nm<sup>3</sup>. The temperature of the system was maintained at 298 K. Protein helices are shown in cyan and loops in orange. POPC is drawn as grey spheres. Water and ions are omitted for clarity.

**Figure S5.** The RMSD of M-domain of *A. oryzae* H<sup>+</sup>-ATPase integrated in palmitoyl oleoylphos phatidylcholine (POPC) lipid bilayer

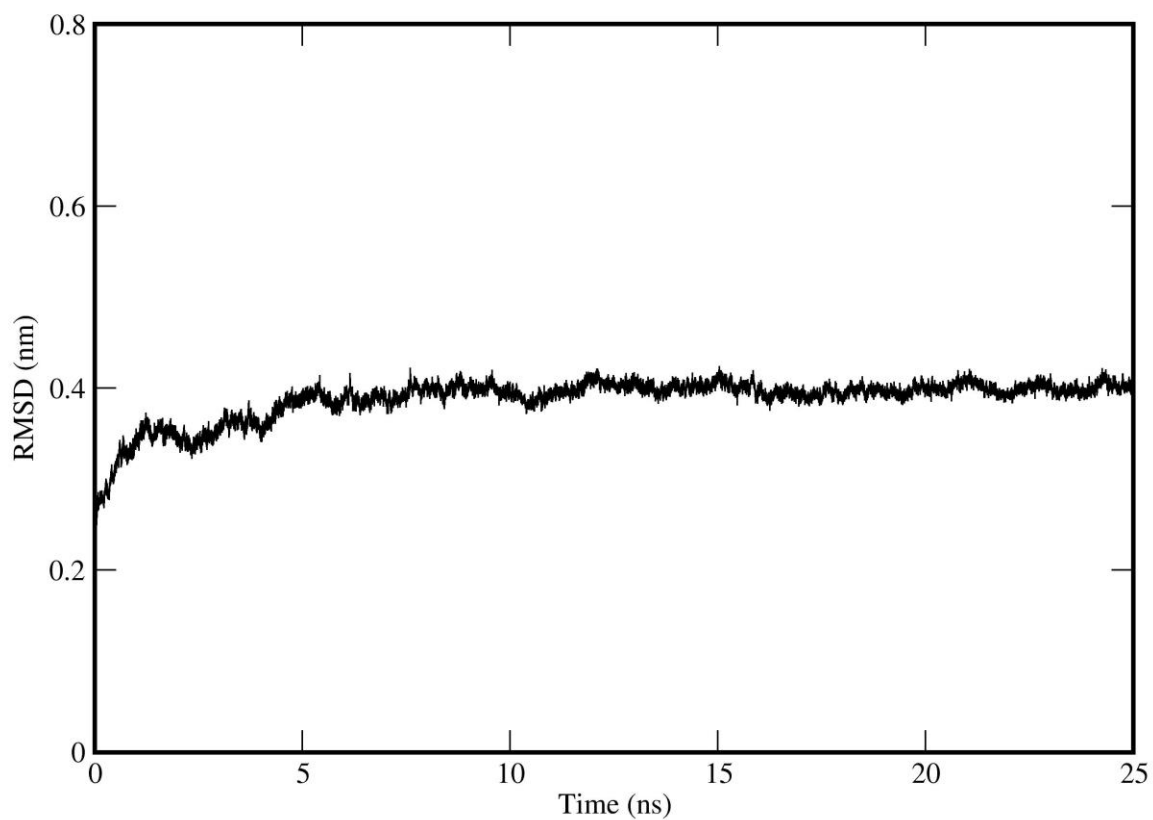

**Table S1.** List of 123 candidate transporter genes with predicted functions from TCDB and TransportDB

| Gene name*     | Database    | TCID        | Predicted function**                               | E-value   | %Alignment |
|----------------|-------------|-------------|----------------------------------------------------|-----------|------------|
| AO090001000091 | TCDB        | 9.C.6       | Mitochondrial organic anion channel family         | 1.00E-24  | 84.32%     |
|                | TCDB        | 9.C.6       | Mitochondrial organic anion channel family         | 8.00E-25  | 87.57%     |
| AO090001000747 | TCDB        | 9.A.45.1.1  | Magnesium transporter, MagT1                       | 2.00E-23  | 97.26%     |
|                | TCDB        | 9.A.45.1.2  | Tumor suppressor candidate 3 isoform a, Tusc3a     | 6.00E-24  | 76.44%     |
| AO090003000050 | TCDB        | 2.A.1.7.1   | L-fucose permease                                  | 1.00E-54  | 87.37%     |
|                | TCDB        | 2.A.1.7.1   | L-fucose permease                                  | 6.00E-55  | 96.80%     |
| AO090003000307 | TCDB        | 2.A.50.1.1  | Glycerol: proton symporter                         | 5.00E-167 | 94.32%     |
|                | TCDB        | 2.A.50.1.1  | Glycerol: proton symporter                         | 6.00E-171 | 96.43%     |
| AO090003000443 | TCDB        | 2.A.41.2.7  | Proton-nucleoside cotransporter CNT1/CNT2          | 9.00E-177 | 98.36%     |
|                | TCDB        | 2.A.41.2.7  | Proton-nucleoside cotransporter CNT1/CNT2          | 5.00E-177 | 98.85%     |
| AO090003000454 | TCDB        | 9.A.50.1.1  | tRNA nuclear export machinery                      | 8.00E-140 | 100.00%    |
|                | TCDB        | 9.A.50.1.1  | tRNA nuclear export machinery                      | 2.00E-135 | 100.00%    |
| AO090003000460 | TCDB        | 5.B.1.1.5   | NADPH oxidase 5 ,Nox5                              | 2.00E-57  | 98.00%     |
|                | TCDB        | 5.B.1.1.1   | Phagocyte NADPH oxidase family                     | 1.00E-92  | 89.47%     |
| AO090003000506 | TCDB        | 3.A.5.8.1   | General secretory pathway (Sec-SRP) complex        | 2.00E-21  | 96.67%     |
|                | TCDB        | 3.A.5.8.1   | General secretory pathway (Sec-SRP) complex        | 9.00E-32  | 100.00%    |
| AO090003000688 | TCDB        | 3.A.19.1.1  | Arsenite-translocating ATPase                      | 3.00E-117 | 96.46%     |
|                | TCDB        | 3.A.19.1.1  | Arsenite-translocating ATPase                      | 7.00E-119 | 92.53%     |
|                | TransportDB | 3.A.4       | Arsenical pump-driving ATPase                      | 2.00E-59  | 93.21%     |
|                | TransportDB | 3.A.4       | Arsenical pump-driving ATPase                      | 1.00E-25  | 97.64%     |
| AO090003000693 | TCDB        | 8.A.32.1.1  | Beta-secretase 1                                   | 6.00E-16  | 88.16%     |
|                | TCDB        | 8.A.32.1.1  | Beta-secretase 1                                   | 3.00E-16  | 76.45%     |
| AO090003000798 | TCDB        | 2.A.53.1.2  | Sulfate permease                                   | 0         | 95.49%     |
|                | TCDB        | 2.A.53.1.2  | Sulfate permease                                   | 0         | 97.68%     |
| AO090003000854 | TCDB        | 2.A.21.6.1  | Urea active transporter                            | 0         | 96.97%     |
|                | TCDB        | 2.A.21.6.1  | Urea active transporter                            | 0         | 95.78%     |
| AO090003000920 | TCDB        | 2.A.47.2.2  | Vacuolar low affinity phosphate transporter, Pho91 | 0         | 100.00%    |
|                | TCDB        | 2.A.47.2.2  | Vacuolar low affinity phosphate transporter, Pho91 | 0         | 100.00%    |
| AO090003001119 | TCDB        | 2.A.55.1.1  | High-affinity metal uptake transporter, Smf1p      | 3.00E-163 | 91.84%     |
|                | TCDB        | 2.A.55.1.1  | High-affinity metal uptake transporter, Smf1p      | 5.00E-168 | 97.57%     |
|                | TransportDB | 2.A.55      | Manganese transport protein, MntH                  | 7.00E-90  | 84.46%     |
|                | TransportDB | 2.A.55      | Manganese transport protein, MntH                  | 6.00E-41  | 92.88%     |
| AO090003001232 | TCDB        | 3.A.1.212.2 | ABC mitochondrial peptide/MDR half transporter     | 0         | 76.43%     |
|                | TCDB        | 3.A.1.212.1 | Mitochondrial peptide exporter, Mdl1p              | 0         | 85.90%     |
| AO090003001233 | TCDB        | 2.A.57.3.1  | Nucleoside transporter, Fun26p                     | 2.00E-45  | 96.19%     |
|                | TCDB        | 2.A.57.3.1  | Nucleoside transporter, Fun26p                     | 3.00E-44  | 89.17%     |
| AO090003001402 | TransportDB | 1.A.35      | Magnesium transport permease                       | 1.00E-24  | 90.26%     |
|                | TransportDB | 1.A.35      | Magnesium transport permease                       | 1.00E-24  | 90.71%     |
| AO090003001404 | TransportDB | 2.A.20      | Phosphate symporter                                | 6.00E-65  | 96.60%     |
|                | TransportDB | 2.A.20      | Phosphate symporter                                | 6.00E-66  | 96.49%     |



| Gene name*     | Database    | TCID        | Predicted function**                                     | E-value   | %Alignment |
|----------------|-------------|-------------|----------------------------------------------------------|-----------|------------|
| AO090003001489 | TCDB        | 5.A.3.3.3   | Anaerobic dimethylsulfoxide reductase                    | 5.00E-13  | 89.99%     |
|                | TCDB        | 5.A.3.6.1   | Arsenite oxidase, AoxAB                                  | 1.00E-24  | 79.88%     |
| AO090005000019 | TCDB        | 2.A.39.3.6  | Benzyl-hydantoin:cation symporter-1, Mhp1                | 8.00E-23  | 93.90%     |
|                | TCDB        | 2.A.39.3.1  | Allantoin permease                                       | 3.00E-154 | 79.69%     |
| AO090005000026 | TCDB        | 2.A.5.1.1   | High affinity zinc uptake transporter, Zrt1              | 2.00E-139 | 99.72%     |
|                | TCDB        | 2.A.5.1.1   | High affinity zinc uptake transporter, Zrt1              | 8.00E-140 | 97.34%     |
| AO090005000114 | TCDB        | 2.A.3.10.7  | Amino acid (Asn/Gln) permease                            | 7.00E-162 | 99.83%     |
|                | TCDB        | 2.A.3.10.2  | General amino acid permease                              | 0         | 90.70%     |
| AO090005000455 | TCDB        | 2.A.40.4.1  | High affinity uric acid-xanthine permease, UapA          | 0         | 96.42%     |
|                | TCDB        | 2.A.40.5.1  | Putative purine permease, YbbY                           | 0         | 93.97%     |
|                | TransportDB | 2.A.40      | Nucleobase/ascorbate transporter                         | 1.00E-68  | 97.65%     |
|                | TransportDB | 2.A.40      | Nucleobase/ascorbate transporter                         | 3.00E-19  | 93.86%     |
| AO090005000714 | TCDB        | 2.A.21.9.2  | Sodium symporter                                         | 3.00E-21  | 18.71%     |
|                | TCDB        | 2.A.21.9.2  | Sodium symporter                                         | 3.00E-21  | 35.99%     |
| AO090005000775 | TCDB        | 2.A.43.1.1  | Lysosomal cystine transporter                            | 4.00E-30  | 81.78%     |
|                | TCDB        | 2.A.43.1.1  | Lysosomal cystine transporter                            | 2.00E-32  | 48.50%     |
| AO090005000842 | TCDB        | 3.A.3.3.6   | Plasma membrane ATPase (proton transporter)              | 0         | 97.88%     |
|                | TCDB        | 3.A.3.3.1   | Plasma membrane ATPase (proton transporter)              | 0         | 94.78%     |
| AO090005000980 | TCDB        | 2.A.38.4.5  | Sodium dependent potassium uptake transporter            | 2.00E-12  | 59.07%     |
|                | TCDB        | 2.A.38.4.5  | Sodium dependent potassium uptake transporter            | 1.00E-12  | 74.29%     |
| AO090005001175 | TCDB        | 3.A.20.1.1  | Peroxisomal targeting signal 2 receptor                  | 2.00E-55  | 97.46%     |
|                | TCDB        | 3.A.20.1.2  | Peroxin complex                                          | 3.00E-75  | 94.95%     |
| AO090005001209 | TCDB        | 9.A.34.1.1  | This family is currently empty                           | 5.00E-144 | 93.53%     |
|                | TCDB        | 9.A.34.2.1  | This family is currently empty                           | 6.00E-140 | 88.62%     |
| AO090005001300 | TCDB        | 2.A.7.22.2  | 4-amino-4-deoxy-L-arabinose-phosphoundecaprenol flippase | 1.00E-135 | 99.62%     |
|                | TCDB        | 2.A.7.22.2  | 4-amino-4-deoxy-L-arabinose-phosphoundecaprenol flippase | 5.00E-136 | 99.61%     |
| AO090005001332 | TCDB        | 2.A.59.1.1  | Plasma membrane arsenite exporter                        | 6.00E-86  | 88.86%     |
|                | TCDB        | 2.A.59.1.2  | Arsenite/antimonite exporter                             | 2.00E-96  | 95.09%     |
|                | TransportDB | 2.A.59      | Arsenical resistance-3 family                            | 2.00E-108 | 94.17%     |
|                | TransportDB | 2.A.59      | Arsenical resistance-3 family                            | 1.00E-44  | 92.23%     |
| AO090005001365 | TCDB        | 2.A.1.2.35  | Galactose-proton symporter, GalP                         | 5.00E-139 | 99.28%     |
|                | TCDB        | 2.A.1.2.35  | Galactose-proton symporter, GalP                         | 6.00E-156 | 99.81%     |
| AO090005001455 | TCDB        | 2.A.97.1.4  | Potassium and hydrogen ion antiporters                   | 2.00E-108 | 77.72%     |
|                | TCDB        | 2.A.97.1.4  | Potassium and hydrogen ion antiporters                   | 1.00E-105 | 84.14%     |
| AO090005001573 | TCDB        | 3.A.1.204.9 | Putative multidrug/pigment exporter, Adp1                | 0         | 99.09%     |
|                | TCDB        | 3.A.1.204.9 | Putative multidrug/pigment exporter, Adp1                | 0         | 98.95%     |
| AO090005001624 | TCDB        | 9.A.14.1.1  | Red-sensitive opsin                                      | 3.00E-126 | 98.35%     |
|                | TCDB        | 9.A.14.1.1  | Red-sensitive opsin                                      | 2.00E-126 | 99.18%     |
| AO090009000002 | TCDB        | 2.A.16.2.2  | Malate transporter                                       | 1.00E-31  | 23.37%     |
|                | TCDB        | 2.A.16.2.2  | Malate transporter                                       | 5.00E-32  | 18.24%     |
| AO090009000183 | TCDB        | 9.A.2.1.1   | Endosomal membrane protein 70, TMN2p                     | 0         | 62.04%     |
|                | TCDB        | 9.A.2.1.1   | Endosomal membrane protein 70, TMN2p                     | 0         | 64.69%     |

| Gene name*     | Database    | TCID         | Predicted function**                            | E-value   | %Alignment |
|----------------|-------------|--------------|-------------------------------------------------|-----------|------------|
| AO090009000197 | TCDB        | 9.B.1.1.1    | CAAX prenyl protease 1 homolog                  | 1.00E-39  | 53.78%     |
|                | TCDB        | 9.B.1.1.1    | CAAX prenyl protease 1 homolog                  | 9.00E-40  | 62.93%     |
| AO090009000400 | TCDB        | 2.A.7.11.1   | UDP-galactose:UMP antiporter                    | 2.00E-37  | 93.30%     |
|                | TCDB        | 2.A.7.11.4   | Golgi UDP-galactose/UDP-glucose:UDP antiporter  | 6.00E-39  | 95.78%     |
| AO090009000405 | TCDB        | 2.A.29.1.3   | ADP/ATP translocase 1                           | 1.00E-164 | 99.68%     |
|                | TCDB        | 2.A.29.1.7   | ADP:ATP carrier 2, Aac2                         | 2.00E-175 | 93.08%     |
| AO090009000582 | TCDB        | 4.C.1.1.3    | Putative long chain fatty acid transporter      | 2.00E-98  | 86.23%     |
|                | TCDB        | 4.C.1.1.5    | Peroxisomal fatty acyl CoA synthase             | 8.00E-102 | 85.00%     |
| AO090009000622 | TCDB        | 8.A.34.1.1   | Endophilin A1                                   | 1.00E-15  | 52.11%     |
|                | TCDB        | 8.A.34.1.1   | Endophilin A1                                   | 2.00E-15  | 69.60%     |
| AO090009000636 | TCDB        | 2.A.36.1.12  | Endosomal/prevacuolar sodium/hydrogen exchanger | 0         | 94.75%     |
|                | TCDB        | 2.A.36.1.12  | Endosomal/prevacuolar sodium/hydrogen exchanger | 0         | 89.26%     |
| AO090009000637 | TCDB        | 2.A.2.6.1    | General alpha-glucoside permease                | 3.00E-116 | 96.39%     |
|                | TCDB        | 2.A.2.6.1    | General alpha-glucoside permease                | 2.00E-107 | 97.65%     |
| AO090009000651 | TCDB        | 3.A.1.201.11 | Multidrug resistance protein 1                  | 0         | 100.00%    |
|                | TCDB        | 3.A.1.201.11 | Multidrug resistance protein 1                  | 0         | 98.59%     |
| AO090009000668 | TCDB        | 8.A.34.2.1   | Phosphate transporter                           | 2.00E-105 | 99.23%     |
|                | TCDB        | 8.A.34.2.1   | Phosphate transporter                           | 1.00E-105 | 98.49%     |
| AO090009000677 | TCDB        | 8.A.13.1.1   | Tetratricopeptide repeat protein 1              | 2.00E-139 | 91.75%     |
|                | TCDB        | 8.A.13.1.1   | Tetratricopeptide repeat protein 1              | 6.00E-145 | 87.10%     |
| AO090009000688 | TCDB        | 2.A.7.13.3   | Golgi GDP-mannose:GDP antiporter, GONST1        | 2.00E-49  | 91.85%     |
|                | TCDB        | 2.A.7.13.2   | Golgi GDP-mannose transporter, VRG4             | 2.00E-138 | 82.75%     |
| AO090010000135 | TCDB        | 2.A.100.1.3  | Ferroportin1 or Iron-regulated protein1, 9FPN1  | 9.00E-40  | 86.88%     |
|                | TCDB        | 2.A.100.1.3  | Ferroportin1 or Iron-regulated protein1, 9FPN1  | 2.00E-42  | 91.22%     |
| AO090010000212 | TCDB        | 9.B.102.4.1  | Rhodanese domain protein                        | 2.00E-12  | 75.87%     |
|                | TCDB        | 9.B.102.4.1  | Rhodanese domain protein                        | 5.00E-13  | 39.57%     |
| AO090010000229 | TCDB        | 2.A.17.2.1   | Probable peptide transporter                    | 6.00E-175 | 95.71%     |
|                | TCDB        | 2.A.17.2.2   | Peptide transporter                             | 0         | 91.18%     |
| AO090010000475 | TCDB        | 3.D.3.2.1    | Cytochrome b-c1 complex subunit Rieske          | 1.00E-78  | 82.70%     |
|                | TCDB        | 1.A.24.1.1   | Cytochrome b-c1 complex subunit Rieske          | 4.00E-90  | 85.12%     |
| AO090010000482 | TransportDB | 3.A.2        | V-type ATPases                                  | 0         | 99.58%     |
|                | TransportDB | 3.A.2        | V-type ATPases                                  | 0         | 96.91%     |
| AO090010000592 | TCDB        | 8.A.5.1.3    | Voltage-gated potassium channel subunit beta-1  | 2.00E-106 | 96.29%     |
|                | TCDB        | 8.A.5.1.3    | Voltage-gated potassium channel subunit beta-1  | 8.00E-107 | 81.55%     |
| AO090010000775 | TCDB        | 2.A.7.10.2   | UDP N-acetylglucosamine antiporter              | 5.00E-41  | 89.22%     |
|                | TCDB        | 2.A.7.10.1   | UDP N-acetylglucosamine transporter             | 1.00E-52  | 97.56%     |
| AO090011000202 | TCDB        | 3.D.5.1.1    | Sodium translocating NADH-quinone reductase     | 1.00E-12  | 58.89%     |
|                | TCDB        | 3.D.5.1.1    | Sodium translocating NADH-quinone reductase     | 1.00E-11  | 64.13%     |
| AO090011000320 | TCDB        | 9.A.6.1.1    | ATP release protein                             | 0         | 95.01%     |
|                | TCDB        | 9.A.6.1.1    | ATP release protein                             | 0         | 98.91%     |
| AO090011000329 | TCDB        | 1.A.8.8.8    | Aquaporin                                       | 9.00E-26  | 90.49%     |
|                | TCDB        | 1.A.8.6.2    | Aquaporin                                       | 3.00E-56  | 80.62%     |

| Gene name*     | Database    | TCID        | Predicted function**                            | E-value   | %Alignment |
|----------------|-------------|-------------|-------------------------------------------------|-----------|------------|
| AO090011000535 | TCDB        | 9.B.82.1.5  | Putative heavy metal transporter                | 8.00E-25  | 94.68%     |
|                | TCDB        | 9.B.82.1.2  | Putative heavy metal transporter                | 9.00E-72  | 82.65%     |
| AO090011000587 | TCDB        | 2.A.1.2.11  | Amine transporter                               | 7.00E-10  | 67.73%     |
|                | TCDB        | 2.A.1.2.29  | Synaptic vesicular amine transporter            | 6.00E-11  | 51.36%     |
| AO090011000638 | TCDB        | 1.A.33.1.2  | Heat shock protein-70 homologue                 | 0         | 97.41%     |
|                | TCDB        | 1.A.33.1.2  | Heat shock protein-70 homologue                 | 0         | 80.09%     |
| AO090011000649 | TCDB        | 2.A.39.2.4  | Cytosine-purine permease                        | 0         | 100.00%    |
|                | TCDB        | 2.A.39.2.4  | Cytosine-purine permease                        | 0         | 100.00%    |
| AO090011000817 | TCDB        | 2.A.52.1.3  | Nickel transporter                              | 2.00E-60  | 55.51%     |
|                | TCDB        | 2.A.52.1.3  | Nickel transporter                              | 1.00E-73  | 85.43%     |
|                | TransportDB | 2.A.52      | Nickel permease                                 | 2.00E-58  | 81.07%     |
|                | TransportDB | 2.A.52      | Nickel permease                                 | 4.00E-44  | 56.99%     |
| AO090011000912 | TCDB        | 2.A.7.25.7  | Magnesium transmembrane transporter             | 0         | 99.85%     |
|                | TCDB        | 2.A.7.25.7  | Magnesium transmembrane transporter             | 0         | 98.99%     |
| AO090012000168 | TCDB        | 1.A.17.2.1  | Anoctamin-like protein                          | 6.00E-37  | 73.39%     |
|                | TCDB        | 1.A.17.2.1  | Anoctamin-like protein                          | 2.00E-37  | 52.70%     |
| AO090012000315 | TCDB        | 2.A.67.1.2  | Tetra peptide transporter                       | 0         | 99.22%     |
|                | TCDB        | 2.A.67.1.2  | Tetra peptide transporter                       | 0         | 97.45%     |
| AO090012000623 | TCDB        | 2.A.1.8.5   | Nitrate transporter                             | 0         | 99.80%     |
|                | TCDB        | 2.A.1.8.5   | Nitrate transporter                             | 0         | 99.61%     |
| AO090012000773 | TCDB        | 3.A.3.10.1  | P-type ATPase                                   | 0         | 97.61%     |
|                | TCDB        | 3.A.3.10.1  | P-type ATPase                                   | 0         | 99.09%     |
| AO090012000787 | TCDB        | 8.A.21.1.1  | Erythrocyte band 7 integral membrane protein    | 4.00E-36  | 70.93%     |
|                | TCDB        | 8.A.21.1.1  | Erythrocyte band 7 integral membrane protein    | 3.00E-33  | 84.03%     |
| AO090012000797 | TCDB        | 3.A.2.2.3   | V-type ATPase                                   | 2.00E-129 | 100.00%    |
|                | TCDB        | 3.A.2.2.3   | V-type ATPase                                   | 1.00E-129 | 100.00%    |
| AO090012000865 | TCDB        | 8.A.21.2.1  | Membrane-bound protease                         | 4.00E-33  | 41.97%     |
|                | TCDB        | 8.A.21.2.1  | Membrane-bound protease                         | 1.00E-27  | 68.42%     |
| AO090012000901 | TCDB        | 2.A.20.2.2  | Phosphate transporter                           | 8.00E-176 | 99.65%     |
|                | TCDB        | 2.A.20.2.1  | Phosphate transporter                           | 0         | 99.49%     |
| AO090012000997 | TCDB        | 1.A.9.5.2   | Gamma-aminobutyric acid receptor subunit beta-2 | 7.00E-48  | 98.31%     |
|                | TCDB        | 1.A.9.5.2   | Gamma-aminobutyric acid receptor subunit beta-2 | 3.00E-48  | 99.15%     |
| AO090012001026 | TCDB        | 8.A.27.1.4  | Phospholipid transporter                        | 1.00E-68  | 90.37%     |
|                | TCDB        | 8.A.27.1.2  | Cell division control protein 50                | 9.00E-114 | 89.51%     |
| AO090020000192 | TCDB        | 2.A.1.25.1  | Acetyl-coenzyme A transporter                   | 6.00E-105 | 89.60%     |
|                | TCDB        | 2.A.1.25.1  | Acetyl-coenzyme A transporter                   | 7.00E-100 | 84.70%     |
| AO090020000415 | TCDB        | 5.A.4.1.1   | This family is currently empty                  | 4.00E-75  | 82.07%     |
|                | TCDB        | 5.A.4.1.1   | This family is currently empty                  | 6.00E-80  | 92.67%     |
| AO090020000492 | TCDB        | 3.B.1.1.5   | Methylmalonyl-CoA decarboxylase                 | 9.00E-71  | 84.83%     |
|                | TCDB        | 3.B.1.1.2   | Methylmalonyl-CoA decarboxylase                 | 4.00E-77  | 96.27%     |
| AO090020000572 | TCDB        | 3.A.1.211.5 | Surfactant-secreting porter, ABCA3              | 8.00E-120 | 68.72%     |
|                | TCDB        | 3.A.1.211.5 | Surfactant-secreting porter, ABCA3              | 2.00E-118 | 67.84%     |

| Gene name*     | Database    | TCID        | Predicted function**                         | E-value   | %Alignment |
|----------------|-------------|-------------|----------------------------------------------|-----------|------------|
| AO090023000569 | TCDB        | 1.A.1.7.1   | Outward-rectifier potassium channel          | 2.00E-55  | 69.09%     |
|                | TCDB        | 1.A.1.7.1   | Outward-rectifier potassium channel          | 1.00E-55  | 62.08%     |
| AO090023000590 | TCDB        | 3.A.3.9.6   | P-type ATPase                                | 0         | 98.39%     |
|                | TCDB        | 3.A.3.9.5   | P-type ATPase                                | 0         | 92.82%     |
| AO090023000801 | TCDB        | 3.B.1.1.1   | Oxaloacetate decarboxylase                   | 1.00E-86  | 51.13%     |
|                | TCDB        | 3.B.1.1.1   | Oxaloacetate decarboxylase                   | 2.00E-84  | 99.15%     |
| AO090023000892 | TCDB        | 9.B.17.1.1  | Vesicle-associated membrane protein          | 8.00E-15  | 34.17%     |
|                | TCDB        | 9.B.17.1.1  | Vesicle-associated membrane protein          | 5.00E-15  | 37.45%     |
| AO090023000895 | TCDB        | 1.B.8.1.1   | Voltage-dependent anion channel porin        | 3.00E-59  | 99.42%     |
|                | TCDB        | 1.B.8.1.1   | Voltage-dependent anion channel porin        | 2.00E-59  | 99.65%     |
| AO090026000231 | TCDB        | 9.B.45.1.3  | Protein kinase                               | 1.00E-14  | 60.10%     |
|                | TCDB        | 9.B.45.1.3  | Protein kinase                               | 1.00E-14  | 50.20%     |
| AO090026000255 | TCDB        | 2.A.72.3.2  | Potassium transporter                        | 0         | 89.74%     |
|                | TCDB        | 2.A.72.3.2  | Potassium transporter                        | 0         | 90.26%     |
|                | TransportDB | 2.A.72      | Potassium transporter                        | 1.00E-96  | 85.54%     |
|                | TransportDB | 2.A.72      | Potassium transporter                        | 2.00E-88  | 83.73%     |
| AO090026000404 | TCDB        | 4.C.2.1.1   | Carnitine O-acetyltransferase                | 2.00E-108 | 96.23%     |
|                | TCDB        | 4.C.2.1.1   | Carnitine O-acetyltransferase                | 3.00E-114 | 96.96%     |
| AO090026000432 | TCDB        | 2.A.49.1.3  | Chloride channel protein                     | 5.00E-169 | 87.17%     |
|                | TCDB        | 2.A.49.2.3  | Chloride channel protein                     | 0         | 90.71%     |
| AO090026000441 | TCDB        | 2.A.5.7.1   | Zinc transporter                             | 3.00E-51  | 100.00%    |
|                | TCDB        | 2.A.5.7.1   | Zinc transporter                             | 2.00E-51  | 100.00%    |
| AO090026000611 | TCDB        | 3.A.7.7.1   | DNA topoisomerase I                          | 2.00E-17  | 86.96%     |
|                | TCDB        | 3.A.7.7.1   | DNA topoisomerase I                          | 6.00E-14  | 78.43%     |
| AO090026000661 | TCDB        | 3.A.1.210.2 | Metal exporter                               | 0         | 87.41%     |
|                | TCDB        | 3.A.1.210.2 | Metal exporter                               | 0         | 96.63%     |
| AO090026000828 | TCDB        | 2.A.19.4.5  | Sodium/calcium antiporter                    | 5.00E-12  | 20.00%     |
|                | TCDB        | 2.A.19.4.4  | Sodium/potassium/calcium exchanger           | 2.00E-27  | 24.83%     |
| AO090038000088 | TCDB        | 3.A.3.1.7   | P-type ATPase                                | 0         | 100.00%    |
|                | TCDB        | 3.A.3.1.7   | P-type ATPase                                | 0         | 100.00%    |
| AO090038000194 | TransportDB | 2.A.44      | This family is currently empty               | 1.00E-44  | 97.37%     |
|                | TransportDB | 2.A.44      | This family is currently empty               | 2.00E-36  | 99.64%     |
| AO090038000314 | TCDB        | 1.A.11.3.2  | Ammonium transporter                         | 9.00E-160 | 97.49%     |
|                | TCDB        | 1.A.11.3.3  | Ammonium transporter                         | 0         | 88.68%     |
| AO090038000322 | TCDB        | 3.A.3.2.2   | P-type ATPase                                | 0         | 84.96%     |
|                | TCDB        | 3.A.3.2.2   | P-type ATPase                                | 0         | 96.76%     |
| AO090038000399 | TCDB        | 3.A.1.31.1  | Possible ABC transporter permease for cobalt | 3.00E-23  | 72.28%     |
|                | TCDB        | 3.A.1.31.1  | Possible ABC transporter permease for cobalt | 2.00E-23  | 85.66%     |
| AO090038000421 | TransportDB | 3.A.1       | ATP-binding Cassette                         | 7.00E-111 | 98.28%     |
|                | TransportDB | 3.A.1       | ATP-binding Cassette                         | 6.00E-108 | 97.65%     |
| AO090038000467 | TCDB        | 2.A.6.6.6   | Niemann-Pick C1-like protein                 | 1.00E-177 | 98.88%     |
|                | TCDB        | 2.A.6.6.3   | Niemann-Pick type C-related protein 1        | 0         | 90.77%     |

| Gene name*      | Database    | TCID         | Predicted function**                                     | E-value   | %Alignment |
|-----------------|-------------|--------------|----------------------------------------------------------|-----------|------------|
| AO090102000102  | TCDB        | 2.A.36.4.4   | Alkali metal cation efflux porter, Cnh1                  | 0         | 73.73%     |
|                 | TCDB        | 2.A.36.4.4   | Alkali metal cation efflux porter, Cnh1                  | 0         | 89.45%     |
| AO090102001037  | TCDB        | 3.D.2.4.1    | Proton-translocating transhydrogenase                    | 5.00E-128 | 99.78%     |
|                 | TCDB        | 3.D.2.3.1    | Proton-translocating transhydrogenase                    | 1.00E-158 | 42.45%     |
| AO090102000567  | TCDB        | 1.C.82.1.1   | Pore-forming amphipathic helical peptide family          | 6.00E-20  | 65.56%     |
|                 | TCDB        | 1.C.82.1.1   | Pore-forming amphipathic helical peptide family          | 4.00E-20  | 86.75%     |
| AO090102000573  | TCDB        | 2.A.9.1.2    | Cytochrome oxidase                                       | 2.00E-29  | 58.67%     |
|                 | TCDB        | 2.A.9.1.1    | Cytochrome oxidase, Oxa1p                                | 2.00E-37  | 78.86%     |
| AO090102000593  | TransportDB | 3.A.5        | General secretory pathway family                         | 3.00E-109 | 96.65%     |
|                 | TransportDB | 3.A.5        | General secretory pathway family                         | 1.00E-51  | 97.91%     |
| AO090102000608  | TCDB        | 9.A.36.1.2   | Scramblase                                               | 2.00E-58  | 57.94%     |
|                 | TCDB        | 9.A.36.1.2   | Scramblase                                               | 1.00E-58  | 78.29%     |
| AO090103000274  | TCDB        | 2.A.22.6.1   | Sodium/imino-acid transporter                            | 4.00E-40  | 66.17%     |
|                 | TCDB        | 2.A.22.3.2   | Sodium and chloride dependent GABA transporter           | 1.00E-53  | 72.12%     |
|                 | TransportDB | 2.A.22       | Sodium symporter                                         | 1.00E-47  | 76.44%     |
|                 | TransportDB | 2.A.22       | Sodium symporter                                         | 2.00E-37  | 72.97%     |
| AO090103000412  | TCDB        | 2.A.2.1.4    | -                                                        | 3.00E-150 | 100.00%    |
|                 | TCDB        | 2.A.2.1.2    | Fucosyl- $\alpha$ -1,6-N-acetylglucosamine uptake porter | 2.00E-164 | 95.94%     |
| AO090120000141  | TCDB        | 1.A.35.5.1   | Magnesium transporter                                    | 2.00E-78  | 56.92%     |
|                 | TCDB        | 1.A.35.5.1   | Magnesium transporter                                    | 1.00E-87  | 70.00%     |
| AO090120000214  | TCDB        | 1.A.56.1.4   | Copper transporter                                       | 4.00E-33  | 80.47%     |
|                 | TCDB        | 1.A.56.1.4   | Copper transporter                                       | 3.00E-34  | 89.21%     |
| AO090120000217  | TCDB        | 2.A.6.6.5    | 3-hydroxy-3-methylglutaryl (HMG)-CoA reductase           | 1.00E-166 | 76.13%     |
|                 | TCDB        | 2.A.6.6.5    | 3-hydroxy-3-methylglutaryl (HMG)-CoA reductase           | 3.00E-167 | 49.66%     |
| AO090120000224  | TransportDB | 9.A.19       | Orphan transporter                                       | 3.00E-105 | 91.39%     |
|                 | TransportDB | 9.A.19       | Orphan transporter                                       | 1.00E-99  | 84.62%     |
| AO090308000016  | TCDB        | 8.B.9.1.1    | Triflin                                                  | 2.00E-18  | 78.75%     |
|                 | TCDB        | 8.B.9.1.2    | Natrin                                                   | 2.00E-19  | 57.32%     |
| AO090701000011  | TCDB        | 8.A.15.1.1   | Potassium channel-associated protein                     | 5.00E-23  | 24.71%     |
|                 | TCDB        | 8.A.15.1.1   | Potassium channel-associated protein                     | 3.00E-23  | 21.02%     |
| AO090701000344  | TCDB        | 2.A.41.3.1   | Nucleoside permease                                      | 8.00E-106 | 84.04%     |
|                 | TCDB        | 2.A.41.3.1   | Nucleoside permease                                      | 5.00E-106 | 83.00%     |
| AO090701000710  | TCDB        | 3.A.1.208.2  | Hepatic canalicular conjugate exporter                   | 0         | 97.52%     |
|                 | TCDB        | 3.A.1.208.11 | Metal resistance protein                                 | 0         | 99.14%     |
| AO09M000000001  | TCDB        | 3.A.2.1.3    | F-type ATPase                                            | 4.00E-11  | 100.00%    |
|                 | TCDB        | 3.A.2.1.3    | F-type ATPase                                            | 2.00E-11  | 100.00%    |
| AO09M0000000013 | TCDB        | 3.D.1.2.1    | NADH dehydrogenase                                       | 1.00E-11  | 79.26%     |
|                 | TCDB        | 3.D.1.2.1    | NADH dehydrogenase                                       | 2.00E-20  | 87.60%     |
| AO090001000748  | TransportDB | 2.A.66       | polysaccharide export                                    | 5.00E-04  | 30.72%     |
|                 | TransportDB | 2.A.66       | polysaccharide export                                    | 5.00E-05  | 26.17%     |
| AO090012000733  | TransportDB | 2.A.25       | sodium ion:alanine symporter                             | 3.00E-17  | 32.40%     |
|                 | TransportDB | 2.A.25       | sodium ion:alanine symporter                             | 8.00E-18  | 19.87%     |

| Gene name*     | Database    | TCID      | Predicted function**           | E-value   | %Alignment |
|----------------|-------------|-----------|--------------------------------|-----------|------------|
| AO090038000297 | TransportDB | 1.A.1     | potassium ion channel          | 6.00E-17  | 87.45%     |
|                | TransportDB | 1.A.1     | potassium ion channel          | 1.00E-07  | 13.88%     |
| AO090011000831 | TCDB        | 2.A.5.5.1 | Zinc transporter               | 6.00E-09  | 53.70%     |
|                | TCDB        | 2.A.5.5.1 | Zinc transporter               | 5.00E-11  | 31.71%     |
| AO09M000000014 | TCDB        | 3.D.4.8.1 | Cytochrome oxidase             | 2.00E-91  | 98.42%     |
|                | TCDB        | 3.D.4.8.1 | Cytochrome oxidase             | 1.00E-91  | 100.00%    |
| AO09M000000015 | TCDB        | 3.D.1.6.2 | NADH-ubiquinone oxidoreductase | 2.00E-45  | 100.00%    |
|                | TCDB        | 3.D.1.6.2 | NADH-ubiquinone oxidoreductase | 1.00E-45  | 100.00%    |
| AO09M000000016 | TransportDB | 2.A.63    | Proton antiporter              | 2.00E-150 | 99.08%     |
|                | TransportDB | 2.A.63    | Proton antiporter              | 9.00E-127 | 95.77%     |

\*Gene name of Candidate transporter gene

\*\*Predicted transporter functions are based on accession number of TCID which links with protein knowledgebase (UniProtKB).

**Table S2.** List of 123 candidate transporter genes with assigned K numbers and KEGG orthology definition

| Gene name      | GhostKOALA | BlastKOALA | KEGGMapper | KEGG orthology definition                                                 |
|----------------|------------|------------|------------|---------------------------------------------------------------------------|
| AO090001000091 | K05770     | K05770     | K05770     | Benzodiazapine receptor                                                   |
| AO090001000747 | K12669     | K12669     | K12669     | Oligosaccharyltransferase complex subunit gamma                           |
| AO090001000748 | K06316     | K06316     | K06316     | Oligosaccharide translocation protein RFT1                                |
| AO090003000050 | K02429     | K02429     | K02429     | MFS transporter, FHS family, L-fucose permease                            |
| AO090003000443 | K03317     | K03317     | K03317     | Concentrative nucleoside transporter, CNT family                          |
| AO090003000454 | K07936     | K07936     | K07936     | GTP-binding nuclear protein Ran                                           |
| AO090003000460 | K08008     | K08008     | K08008     | NADPH oxidase                                                             |
| AO090003000688 | K01551     | K01551     | K01551     | Arsenite-transporting ATPase [EC:3.6.3.16]                                |
| AO090003000693 | K01381     | K01381     | K01381     | Saccharopepsin [EC:3.4.23.25]                                             |
| AO090003000798 | K14708     | K14708     | K14708     | Solute carrier family 26 (sodium-independent sulfate anion transporter)   |
| AO090003000920 | K14430     | K14430     | K14430     | Phosphate transporter                                                     |
| AO090003001119 | K12346     | K12346     | K12346     | Metal iron transporter                                                    |
| AO090003001233 | K15014     | K15014     | K15014     | Solute carrier family 29 (equilibrative nucleoside transporter)           |
| AO090003001402 | K16073     | K16073     | K16073     | Magnesium transporter                                                     |
| AO090003001404 | K14640     | K14640     | K14640     | Solute carrier family 20 (sodium-dependent phosphate transporter)         |
| AO090005000019 | K03457     | K03457     | K03457     | Nucleobase:cation symporter-1, NCS1 family                                |
| AO090005000026 | K14709     | K14709     | K14709     | Solute carrier family 39 (zinc transporter), member 1/2/3                 |
| AO090005000114 | K16261     | K16261     | K16261     | Yeast amino acid transporter                                              |
| AO090005000455 |            |            | K03458     | Nucleobase:cation symporter-2, NCS2 family                                |
| AO090005000775 | K12386     | K12386     | K12386     | Cystinosin                                                                |
| AO090005000842 | K01535     | K01535     | K01535     | H <sup>+</sup> -transporting ATPase [EC:3.6.3.6]                          |
| AO090005000980 | K03857     | K03857     | K03857     | Phosphatidylinositol glycan, class A [EC:2.4.1.198]                       |
| AO090005001175 | K13341     | K13341     | K13341     | Peroxin-7                                                                 |
| AO090005001300 | K15633     | K15633     | K15633     | 2,3-bisphosphoglycerate-independent phosphoglycerate mutase [EC:5.4.2.12] |
| AO090005001332 | K03325     | K03325     | K03325     | Arsenite transporter, ACR3 family                                         |
| AO090005001455 | K17800     | K17800     | K17800     | LETM1 and EF-hand domain-containing protein 1, mitochondrial              |
| AO090005001624 | K14298     | K14298     | K14298     | mRNA export factor                                                        |
| AO090009000183 | K17907     | K17907     | K17907     | Autophagy-related protein 9                                               |
| AO090009000400 | K15275     | K15275     | K15275     | Solute carrier family 35 (UDP-galactose transporter)                      |
| AO090009000405 | K05863     | K05863     | K05863     | Solute carrier family 25 (mitochondrial adenine nucleotide translocator)  |
| AO090009000636 | K12041     | K12041     | K12041     | Solute carrier family 9 (sodium/hydrogen exchanger)                       |
| AO090009000637 | K15378     | K15378     | K15378     | Solute carrier family 45                                                  |
| AO090009000651 | K05658     | K05658     | K05658     | ATP-binding cassette, subfamily B (MDR/TAP) [EC:3.6.3.44]                 |
| AO090009000668 | K12562     | K12562     | K12562     | Amphiphysin                                                               |
| AO090009000677 | K15176     | K15176     | K15176     | RNA polymerase-associated protein CTR9                                    |
| AO090009000688 | K15356     | K15356     | K15356     | GDP-mannose transporter                                                   |
| AO090010000135 | K14685     | K14685     | K14685     | Solute carrier family 40 (iron-regulated transporter)                     |
| AO090010000212 | K01011     | K01011     | K01011     | Thiosulfate/3-mercaptopyruvate sulfurtransferase [EC:2.8.1.1 2.8.1.2]     |
| AO090010000229 | K03305     | K03305     | K03305     | Proton-dependent oligopeptide transporter, POT family                     |
| AO090010000475 | K00411     | K00411     | K00411     | Ubiquinol-cytochrome c reductase iron-sulfur subunit [EC:1.10.2.2]        |

| Gene name      | GhostKOALA | BlastKOALA | KEGGMapper | KEGG orthology definition                                                                                                            |
|----------------|------------|------------|------------|--------------------------------------------------------------------------------------------------------------------------------------|
| AO090010000482 | K02133     | K02133     | K02133     | F-type H <sup>+</sup> -transporting ATPase subunit beta [EC:3.6.3.14]                                                                |
| AO090010000775 | K15278     | K15278     | K15278     | Solute carrier family 35 (UDP-xylose/UDP-N-acetylglucosamine transporter)                                                            |
| AO090011000202 | K05916     | K05916     | K05916     | Nitric oxide dioxygenase [EC:1.14.12.17]                                                                                             |
| AO090011000320 | K05285     | K05285     | K05285     | Phosphatidylinositol glycan, class N [EC:2.7.-.-]                                                                                    |
| AO090011000329 | K09885     | K09885     | K09885     | Aquaporin related protein, other eukaryote                                                                                           |
| AO090011000638 | K04043     | K04043     | K04043     | Molecular chaperone DnaK                                                                                                             |
| AO090011000817 | K07241     | K07241     | K07241     | High-affinity nickel-transport protein                                                                                               |
| AO090011000831 | K07238     | K07238     | K07238     | Zinc transporter, ZIP family                                                                                                         |
| AO090012000623 | K02575     | K02575     | K02575     | MFS transporter, NNP family, nitrate/nitrite transporter                                                                             |
| AO090012000733 | K01613     | K01613     | K01613     | Phosphatidylserine decarboxylase [EC:4.1.1.65]                                                                                       |
| AO090012000773 | K14950     | K14950     | K14950     | Cation-transporting ATPase 13A1 [EC:3.6.3.-]                                                                                         |
| AO090012000797 | K02146     | K02146     | K02146     | V-type H <sup>+</sup> -transporting ATPase subunit d                                                                                 |
| AO090012000901 | K14640     | K14640     | K14640     | Solute carrier family 20 (sodium-dependent phosphate transporter)                                                                    |
| AO090012000997 | K08341     | K08341     | K08341     | GABA(A) receptor-associated protein                                                                                                  |
| AO090020000415 | K00234     | K00234     | K00234     | Succinate dehydrogenase (ubiquinone) flavoprotein subunit [EC:1.3.5.1]                                                               |
| AO090020000492 | K01969     | K01969     | K01969     | 3-methylcrotonyl-CoA carboxylase beta subunit [EC:6.4.1.4]                                                                           |
| AO090023000569 |            | K05389     | K05389     | Potassium channel subfamily K, other eukaryote                                                                                       |
| AO090023000801 | K01958     | K01958     | K01958     | Pyruvate carboxylase [EC:6.4.1.1]                                                                                                    |
| AO090023000895 | K15040     | K15040     | K15040     | Voltage-dependent anion channel protein 2                                                                                            |
| AO090026000231 | K08794     | K08794     | K08794     | Calcium/calmodulin-dependent protein kinase I [EC:2.7.11.17]                                                                         |
| AO090026000255 | K03549     | K03549     | K03549     | KUP system potassium uptake protein                                                                                                  |
| AO090026000404 | K00624     | K00624     | K00624     | Carnitine O-acetyltransferase [EC:2.3.1.7]                                                                                           |
| AO090026000432 | K05012     | K05012     | K05012     | Chloride channel 3/4/5                                                                                                               |
| AO090026000441 | K14715     | K14715     | K14715     | Solute carrier family 39 (zinc transporter)                                                                                          |
| AO090026000611 | K03165     | K03165     | K03165     | DNA topoisomerase III [EC:5.99.1.2]                                                                                                  |
| AO090026000828 | K13754     | K13754     | K13754     | Solute carrier family 24 (sodium/potassium/calcium exchanger)                                                                        |
| AO090038000088 | K01539     | K01539     | K01541*    | Sodium/potassium-transporting ATPase subunit alpha [EC:3.6.3.9]<br>* H <sup>+</sup> /K <sup>+</sup> -exchanging ATPase [EC:3.6.3.10] |
| AO090038000314 | K03320     | K03320     | K03320     | Ammonium transporter, Amt family                                                                                                     |
| AO090038000322 | K01537     | K01537     | K01537     | Ca <sup>2+</sup> -transporting ATPase [EC:3.6.3.8]                                                                                   |
| AO090038000399 | K06174     | K06174     | K06174     | ATP-binding cassette, sub-family E, member 1                                                                                         |
| AO090038000467 | K12385     | K12385     | K12385     | Niemann-Pick C1 protein                                                                                                              |
| AO090102001037 | K00323     | K00323     | K00323     | NAD(P) transhydrogenase [EC:1.6.1.2]                                                                                                 |
| AO090102000567 | K02863     | K02863     | K02863     | Large subunit ribosomal protein L1                                                                                                   |
| AO090102000573 | K03217     | K03217     | K03217     | YidC/Oxa1 family membrane protein insertase                                                                                          |
| AO090102000593 | K03106     | K03106     | K03106     | Signal recognition particle subunit SRP54                                                                                            |
| AO090103000274 | K05034     | K05034     | K05034     | Solute carrier family 6 (neurotransmitter transporter, GABA)                                                                         |
| AO090103000412 | K17086     | K17086     | K17086     | Transmembrane 9 superfamily member 2/4                                                                                               |
| AO090120000141 | K16075     | K16075     | K05747*    | Magnesium transporter<br>*Wiskott-Aldrich syndrome protein                                                                           |
| AO090120000214 | K14686     | K14686     | K14686     | Solute carrier family 31 (copper transporter)                                                                                        |
| AO090120000217 | K00021     | K00021     | K00021     | Hydroxymethylglutaryl-CoA reductase (NADPH) [EC:1.1.1.34]                                                                            |



| Gene name       | GhostKOALA | BlastKOALA | KEGGMapper | KEGG orthology definition                            |
|-----------------|------------|------------|------------|------------------------------------------------------|
| AO090120000224  | K00088     | K00088     | K00088     | IMP dehydrogenase [EC:1.1.1.205]                     |
| AO090701000011  | K04706     | K04706     | K04706     | E3 SUMO-protein ligase PIAS1 [EC: 6.3.2.-]           |
| AO09M000000001  |            | K02125     | K02125     | F-type H <sup>+</sup> -transporting ATPase subunit 8 |
| AO09M0000000013 |            |            | K03880     | NADH-ubiquinone oxidoreductase chain 3 [EC:1.6.5.3]  |
| AO09M0000000014 | K02261     | K02261     | K02261     | cytochrome c oxidase subunit 2                       |
| AO09M0000000015 |            |            | K03882     | NADH-ubiquinone oxidoreductase chain 4L [EC:1.6.5.3] |
| AO09M0000000016 | K03883     | K03883     | K03883     | NADH-ubiquinone oxidoreductase chain 5 [EC:1.6.5.3]  |
| AO090003000307  |            |            |            | Unclassified process                                 |
| AO090003000506  |            |            |            | Unclassified process                                 |
| AO090003000854  |            |            |            | Unclassified process                                 |
| AO090003001232  |            |            |            | Unclassified process                                 |
| AO090003001489  |            |            |            | Unclassified process                                 |
| AO090005000714  |            |            |            | Unclassified process                                 |
| AO090005001209  |            |            |            | Unclassified process                                 |
| AO090005001365  |            |            |            | Unclassified process                                 |
| AO090005001573  |            |            |            | Unclassified process                                 |
| AO090009000002  |            |            |            | Unclassified process                                 |
| AO090009000197  |            |            |            | Unclassified process                                 |
| AO090009000582  |            |            |            | Unclassified process                                 |
| AO090009000622  |            |            |            | Unclassified process                                 |
| AO090010000592  |            |            |            | Unclassified process                                 |
| AO090011000535  |            |            |            | Unclassified process                                 |
| AO090011000587  |            |            |            | Unclassified process                                 |
| AO090011000649  |            |            |            | Unclassified process                                 |
| AO090011000912  |            |            |            | Unclassified process                                 |
| AO090012000168  |            |            |            | Unclassified process                                 |
| AO090012000315  |            |            |            | Unclassified process                                 |
| AO090012000787  |            |            |            | Unclassified process                                 |
| AO090012000865  |            |            |            | Unclassified process                                 |
| AO090012001026  |            |            |            | Unclassified process                                 |
| AO090020000192  |            |            |            | Unclassified process                                 |
| AO090020000572  |            |            |            | Unclassified process                                 |
| AO090023000590  |            |            |            | Unclassified process                                 |
| AO090023000892  |            |            |            | Unclassified process                                 |
| AO090026000661  |            |            |            | Unclassified process                                 |
| AO090038000194  |            |            |            | Unclassified process                                 |
| AO090038000297  |            |            |            | Unclassified process                                 |
| AO090038000421  |            |            |            | Unclassified process                                 |
| AO090102000102  |            |            |            | Unclassified process                                 |
| AO090102000608  |            |            |            | Unclassified process                                 |
| AO090308000016  |            |            |            | Unclassified process                                 |
| AO090701000344  |            |            |            | Unclassified process                                 |

---

| <b>Gene name</b> | <b>GhostKOALA</b> | <b>BlastKOALA</b> | <b>KEGGMapper</b> | <b>KEGG orthology definition</b> |
|------------------|-------------------|-------------------|-------------------|----------------------------------|
| AO090701000710   |                   |                   |                   | Unclassified process             |

---

**Table S3.** List of 65 transporter genes and functions involved in *A. oryzae* metabolism

| Gene name      | Transporter description based on KEGG orthology                           |
|----------------|---------------------------------------------------------------------------|
| AO090005000842 | H <sup>+</sup> -transporting ATPase [EC:3.6.3.6]                          |
| AO090003000050 | MFS transporter, FHS family, L-fucose permease                            |
| AO090003000443 | Concentrative nucleoside transporter, CNT family                          |
| AO090003000688 | Arsenite-transporting ATPase [EC:3.6.3.16]                                |
| AO090003000798 | Solute carrier family 26 (sodium-independent sulfate anion transporter)   |
| AO090003000920 | Phosphate transporter                                                     |
| AO090003001119 | Metal iron transporter                                                    |
| AO090003001233 | Solute carrier family 29 (equilibrative nucleoside transporter)           |
| AO090003001402 | Magnesium transporter                                                     |
| AO090003001404 | Solute carrier family 20 (sodium-dependent phosphate transporter)         |
| AO090005000019 | Nucleobase:cation symporter-1, NCS1 family                                |
| AO090005000026 | Solute carrier family 39 (zinc transporter), member 1/2/3                 |
| AO090005000114 | Yeast amino acid transporter                                              |
| AO090005000455 | Nucleobase:cation symporter-2, NCS2 family                                |
| AO090005001332 | Arsenite transporter, ACR3 family                                         |
| AO090005001455 | LETM1 and EF-hand domain-containing protein 1, mitochondrial              |
| AO090009000400 | Solute carrier family 35 (UDP-galactose transporter)                      |
| AO090009000405 | Solute carrier family 25 (mitochondrial adenine nucleotide translocator)  |
| AO090009000636 | Solute carrier family 9 (sodium/hydrogen exchanger)                       |
| AO090009000637 | Solute carrier family 45                                                  |
| AO090009000651 | ATP-binding cassette, subfamily B (MDR/TAP) [EC:3.6.3.44]                 |
| AO090009000688 | GDP-mannose transporter                                                   |
| AO090010000135 | Solute carrier family 40 (iron-regulated transporter)                     |
| AO090010000212 | Thiosulfate/3-mercaptopyruvate sulfurtransferase [EC:2.8.1.1 2.8.1.2]     |
| AO090010000229 | Proton-dependent oligopeptide transporter, POT family                     |
| AO090010000475 | Ubiquinol-cytochrome c reductase iron-sulfur subunit [EC:1.10.2.2]        |
| AO090010000482 | F-type H <sup>+</sup> -transporting ATPase subunit beta [EC:3.6.3.14]     |
| AO090010000775 | Solute carrier family 35 (UDP-xylose/UDP-N-acetylglucosamine transporter) |
| AO090011000329 | Aquaporin related protein, other eukaryote                                |
| AO090011000817 | High-affinity nickel-transport protein                                    |
| AO090012000623 | MFS transporter, NNP family, nitrate/nitrite transporter                  |
| AO090012000773 | Cation-transporting ATPase 13A1 [EC:3.6.3.-]                              |
| AO090012000797 | V-type H <sup>+</sup> -transporting ATPase subunit d                      |
| AO090012000901 | Solute carrier family 20 (sodium-dependent phosphate transporter)         |
| AO090023000569 | Potassium channel subfamily K, other eukaryote                            |
| AO090023000895 | Voltage-dependent anion channel protein 2                                 |
| AO090026000255 | KUP system potassium uptake protein                                       |
| AO090026000432 | Chloride channel 3/4/5                                                    |
| AO090026000441 | Solute carrier family 39 (zinc transporter)                               |

| Gene name      | Transporter description based on KEGG orthology                           |
|----------------|---------------------------------------------------------------------------|
| AO090026000828 | Solute carrier family 24 (sodium/potassium/calcium exchanger)             |
| AO090038000088 | Sodium/potassium-transporting ATPase subunit alpha [EC:3.6.3.9]           |
| AO090038000314 | Ammonium transporter, Amt family                                          |
| AO090038000322 | Ca <sup>2+</sup> -transporting ATPase [EC:3.6.3.8]                        |
| AO090038000399 | ATP-binding cassette, sub-family E, member 1                              |
| AO090102001037 | NAD(P) transhydrogenase [EC:1.6.1.2]                                      |
| AO090103000274 | Solute carrier family 6 (neurotransmitter transporter, GABA)              |
| AO090120000141 | Magnesium transporter                                                     |
| AO090120000214 | Solute carrier family 31 (copper transporter)                             |
| AO090120000217 | Hydroxymethylglutaryl-CoA reductase (NADPH) [EC:1.1.1.34]                 |
| AO09M000000001 | F-type H <sup>+</sup> -transporting ATPase subunit 8                      |
| AO09M000000013 | NADH-ubiquinone oxidoreductase chain 3 [EC:1.6.5.3]                       |
| AO090001000748 | Oligosaccharide translocation protein RFT1                                |
| AO090012000733 | Phosphatidylserine decarboxylase [EC:4.1.1.65]                            |
| AO090011000831 | Zinc transporter, ZIP family                                              |
| AO09M000000014 | cytochrome c oxidase subunit 2                                            |
| AO09M000000015 | NADH-ubiquinone oxidoreductase chain 4L [EC:1.6.5.3]                      |
| AO09M000000016 | NADH-ubiquinone oxidoreductase chain 5 [EC:1.6.5.3]                       |
| AO090001000747 | Oligosaccharyltransferase complex subunit gamma                           |
| AO090023000801 | Pyruvate carboxylase [EC:6.4.1.1]                                         |
| AO090005000980 | Phosphatidylinositol glycan, class A [EC:2.4.1.198]                       |
| AO090005001300 | 2,3-bisphosphoglycerate-independent phosphoglycerate mutase [EC:5.4.2.12] |
| AO090120000224 | IMP dehydrogenase [EC:1.1.1.205]                                          |
| AO090011000320 | Phosphatidylinositol glycan, class N [EC:2.7.-.-]                         |
| AO090020000415 | Succinate dehydrogenase (ubiquinone) flavoprotein subunit [EC:1.3.5.1]    |
| AO090020000492 | 3-methylcrotonyl-CoA carboxylase beta subunit [EC:6.4.1.4]                |

**Table S4.** List of 65 transporter genes with curated functions from integrative databases of TCDB, KEGG, and PFAM

| Gene name      | TCID         | TCID definition                           | KEGG orthology                                  | PFAM                                                       |
|----------------|--------------|-------------------------------------------|-------------------------------------------------|------------------------------------------------------------|
| AO090005000842 | 3.A.3.3.6    | Plasma membrane ATPase                    | H <sup>+</sup> -transporting ATPase             | E1-E2 ATPase                                               |
| AO090003000050 | 2.A.1.7.1    | L-fucose permease                         | MFS transporter, L-fucose permease              | Major Facilitator Superfamily                              |
| AO090003000443 | 2.A.41.2.7   | Proton-nucleoside transporter             | Concentrative nucleoside transporter            | Na <sup>+</sup> nucleoside transporter                     |
| AO090003000688 | 3.A.19.1.1   | Arsenite-translocating ATPase             | Arsenite-transporting ATPase                    | Anion-transporting ATPase                                  |
| AO090003000798 | 2.A.53.1.2   | Sulfate permease                          | Na <sup>+</sup> independent sulfate transporter | Sulfate permease family                                    |
| AO090003000920 | 2.A.47.2.2   | Phosphate transporter                     | Phosphate transporter                           | Na <sup>+</sup> sulfate symporter                          |
| AO090003001119 | 2.A.55.1.1   | Metal uptake transporter                  | Metal iron transporter                          | Divalent metal ion transporter                             |
| AO090003001233 | 2.A.57.3.1   | Nucleoside transporter                    | Equilibrative nucleoside transporter            | Nucleoside transporter                                     |
| AO090003001402 | 1.A.35       | Magnesium transport permease              | Magnesium transporter                           | Mg <sup>2+</sup> transporter                               |
| AO090003001404 | 2.A.20       | Phosphate symporter                       | Na <sup>+</sup> dependent phosphate transporter | Phosphate transporter family                               |
| AO090005000019 | 2.A.39.3.1   | Allantoin permease                        | Nucleobase:cation symporter                     | Permease for cytosine/purines, uracil, thiamine, allantoin |
| AO090005000026 | 2.A.5.1.1    | Zinc uptake transporter                   | Zinc transporter                                | Zinc transporter                                           |
| AO090005000114 | 2.A.3.10.2   | Amino acid permease                       | Yeast amino acid transporter                    | Amino acid permease                                        |
| AO090005000455 | 2.A.40.5.1   | Putative purine permease                  | Nucleobase:cation symporter                     | Permease family                                            |
| AO090005001332 | 2.A.59.1.1   | Arsenite exporter                         | Arsenite transporter                            | Na <sup>+</sup> /bile acid co-transporters                 |
| AO090005001455 | 2.A.97.1.4   | K <sup>+</sup> /H <sup>+</sup> antiporter | LETM1                                           | K <sup>+</sup> /H <sup>+</sup> antiporter                  |
| AO090009000400 | 2.A.7.11.1   | UDP-galactose:UMP antiporter              | UDP-galactose transporter                       | UAA transporter family                                     |
| AO090009000405 | 2.A.29.1.3   | ADP/ATP translocase                       | ADP/ATP translocator                            | Mitochondrial carrier protein                              |
| AO090009000636 | 2.A.36.1.12  | Na <sup>+</sup> /H <sup>+</sup> exchanger | Na <sup>+</sup> /H <sup>+</sup> exchanger       | Na <sup>+</sup> /H <sup>+</sup> exchanger                  |
| AO090009000637 | 2.A.2.6.1    | Alpha-glucoside permease                  | Solute carrier family 45                        | MFS/sugar transport protein                                |
| AO090009000651 | 3.A.1.201.11 | Multidrug resistance protein              | ATP-binding cassette                            | ABC transporter                                            |
| AO090009000688 | 2.A.7.13.2   | GDP-mannose transporter                   | GDP-mannose transporter                         | Nucleoside-sugar transporters                              |
| AO090010000135 | 2.A.100.1.3  | Ferroportin                               | Iron-regulated transporter                      | Ferroportin1 (FPN1)                                        |
| AO090010000212 | 9.B.102.4.1  | Rhodanese domain protein                  | 3-mercaptopyruvate sulfurtransferase            | Rhodanese-like domain                                      |
| AO090010000229 | 2.A.17.2.2   | Peptide transporter                       | Oligopeptide transporter                        | POT family                                                 |
| AO090010000475 | 3.D.3.2.1    | Cytochrome b-c                            | Ubiquinol-cytochrome c reductase                | Ubiquinol-cytochrome-c reductase                           |
| AO090010000482 | 3.A.2        | V-type ATPase                             | F-type H <sup>+</sup> -transporting ATPase      | ATP synthase                                               |
| AO090010000775 | 2.A.7.10.2   | UDP N-acetylglucosamine antiporter        | UDP-xylose/UDP-N-acetylglucosamine transporter  | UAA transporter family                                     |
| AO090011000329 | 1.A.8.8.8    | Aquaporin                                 | Aquaporin                                       | Aquaporin                                                  |
| AO090011000817 | 2.A.52.1.3   | Nickel transporter                        | High-affinity nickel-transport protein          | High-affinity nickel-transporter                           |
| AO090012000623 | 2.A.1.8.5    | Nitrate transporter                       | Nitrate/nitrite transporter                     | Major Facilitator Superfamily                              |
| AO090012000773 | 3.A.3.10.1   | P-type ATPase                             | Cation-transporting ATPase                      | Halo acid dehalogenase                                     |
| AO090012000797 | 3.A.2.2.3    | V-type ATPase                             | V-type H <sup>+</sup> -transporting ATPase      | ATP synthase                                               |
| AO090012000901 | 2.A.20.2.2   | Phosphate transporter                     | Na <sup>+</sup> dependent phosphate transporter | Phosphate transporter family                               |
| AO090023000569 | 1.A.1.7.1    | Potassium channel                         | Potassium channel                               | Ion channel                                                |
| AO090023000895 | 1.B.8.1.1    | Voltage-dependent anion channel           | Voltage-dependent anion channel                 | Eukaryotic porin                                           |
| AO090026000255 | 2.A.72.3.2   | Potassium transporter                     | Potassium uptake transporter                    | Potassium transporter                                      |

| Gene name      | TCID       | TCID definition                                              | KEGG orthology                                                 | PFAM                                                        |
|----------------|------------|--------------------------------------------------------------|----------------------------------------------------------------|-------------------------------------------------------------|
| AO090026000432 | 2.A.49.1.3 | Chloride channel                                             | Chloride channel                                               | Voltage gated chloride channel                              |
| AO090026000441 | 2.A.5.7.1  | Zinc transporter                                             | Zinc transporter                                               | Zinc transporter                                            |
| AO090026000828 | 2.A.19.4.4 | Na <sup>+</sup> /K <sup>+</sup> /Ca <sup>2+</sup> exchanger  | Na <sup>+</sup> /K <sup>+</sup> /Ca <sup>2+</sup> exchanger    | Na <sup>+</sup> /K <sup>+</sup> /Ca <sup>2+</sup> exchanger |
| AO090038000088 | 3.A.3.1.7  | P-type ATPase                                                | Na <sup>+</sup> /K <sup>+</sup> -transporting ATPase           | E1-E2 ATPase                                                |
| AO090038000314 | 1.A.11.3.2 | Ammonium transporter                                         | Ammonium transporter                                           | Ammonium transporter                                        |
| AO090038000322 | 3.A.3.2.2  | P-type ATPase                                                | Ca <sup>2+</sup> -transporting ATPase                          | Cation transporting ATPase                                  |
| AO090038000399 | 3.A.1.31.1 | Cobalt ABC transporter                                       | ATP-binding cassette                                           | ABC transporter                                             |
| AO090102001037 | 3.D.2.4.1  | NAD(P) transhydrogenase                                      | NAD(P) transhydrogenase                                        | NAD(P) transhydrogenase                                     |
| AO090103000274 | 2.A.22.3.2 | Na <sup>+</sup> /Cl <sup>-</sup> GABA transporter            | GABA transporter                                               | Na <sup>+</sup> neurotransmitter symporter                  |
| AO090120000141 | 1.A.35.5.1 | Magnesium transporter                                        | Magnesium transporter                                          | Magnesium transporter                                       |
| AO090120000214 | 1.A.56.1.4 | Copper transporter                                           | Copper transporter                                             | Copper transporter                                          |
| AO090120000217 | 2.A.6.6.5  | 3-hydroxy-3-methylglutaryl (HMG)-<br>CoA reductase           | Hydroxymethylglutaryl-CoA reductase<br>(NADPH)                 | Hydroxymethylglutaryl-coenzyme A<br>reductase               |
| AO09M000000001 | 3.A.2.1.3  | F-type ATPase                                                | F-type H <sup>+</sup> -transporting ATPase                     | Fungal ATP synthase                                         |
| AO09M000000013 | 3.D.1.2.1  | NADH dehydrogenase                                           | NADH-ubiquinone oxidoreductase                                 | NADH-ubiquinone oxidoreductase                              |
| AO090001000748 | 2.A.66     | Polysaccharide exporter                                      | Oligosaccharide translocation protein                          | Oligosaccharide translocator                                |
| AO090012000733 | 2.A.25     | Na <sup>+</sup> alanine symporter                            | Phosphatidylserine decarboxylase                               | Phosphatidylserine decarboxylase                            |
| AO090011000831 | 2.A.5.5.1  | Zinc transporter                                             | Zinc transporter                                               | Zinc transporter                                            |
| AO09M000000014 | 3.D.4.8.1  | Cytochrome C oxidase                                         | Cytochrome C oxidase                                           | Cytochrome C oxidase                                        |
| AO09M000000015 | 3.D.1.6.2  | NADH-ubiquinone oxidoreductase                               | NADH-ubiquinone oxidoreductase                                 | NADH-ubiquinone oxidoreductase                              |
| AO09M000000016 | 2.A.63     | Proton antiporter                                            | NADH-ubiquinone oxidoreductase                                 | Proton-conducting transporter                               |
| AO090001000747 | 9.A.45.1.1 | Magnesium transporter                                        | Oligosaccharyltransferase                                      | OST3 / OST6 family                                          |
| AO090023000801 | 3.B.1.1.1  | Oxaloacetate decarboxylase                                   | Pyruvate carboxylase                                           | Carbamoyl-phosphate synthase                                |
| AO090005000980 | 2.A.38.4.5 | Na <sup>+</sup> /K <sup>+</sup> transporter                  | Phosphatidylinositol glycan                                    | GPI anchor                                                  |
| AO090005001300 | 2.A.7.22.2 | 4-amino-4-deoxy-L-arabinose-<br>phosphoundecaprenol flippase | 2,3-bisphosphoglycerate-independent<br>phosphoglycerate mutase | BPG-independent PGAM                                        |
| AO090120000224 | 9.A.19     | Orphan transporter                                           | IMP dehydrogenase                                              | IMP dehydrogenase                                           |
| AO090011000320 | 9.A.6.1.1  | ATP release protein                                          | Phosphatidylinositol glycan                                    | Phosphatidylinositolglycan                                  |
| AO090020000415 | 5.A.4.1.1  | This family is currently empty                               | Succinate dehydrogenase                                        | FAD binding domain                                          |
| AO090020000492 | 3.B.1.1.5  | Methylmalonyl-CoA decarboxylase                              | 3-methylcrotonyl-CoA carboxylase                               | Carboxyl transferase domain                                 |

**Table S5.** List of top 10 identified templates for *A. oryzae* H<sup>+</sup>-ATPase encoded by AO090005000842 gene

| Template | Sequence<br>Identity | Method | Resolution | Sequence<br>Similarity | Coverage | Description                                          |
|----------|----------------------|--------|------------|------------------------|----------|------------------------------------------------------|
| 1mhs.1.A | 77.47                | 2DX    | 8.00Å      | 0.53                   | 0.94     | Plasma Membrane ATPase                               |
| 3b8c.1.A | 40.93                | X-ray  | 3.60Å      | 0.40                   | 0.82     | ATPase 2, plasma membrane-type                       |
| 4hyt.1.A | 24.24                | X-ray  | 3.40Å      | 0.32                   | 0.87     | Sodium/potassium-transporting ATPase subunit alpha-1 |
| 3b8e.1.A | 24.24                | X-ray  | 3.50Å      | 0.32                   | 0.87     | Sodium/potassium-transporting ATPase subunit alpha-1 |
| 3a3y.1.A | 23.39                | X-ray  | 2.80Å      | 0.32                   | 0.87     | Na, K-ATPase alpha subunit                           |
| 2yn9.1.A | 24.06                | 2DX    | 8.00Å      | 0.32                   | 0.87     | Potassium-transporting ATPase alpha                  |
| 2c88.1.A | 25.69                | X-ray  | 3.10Å      | 0.32                   | 0.85     | Sarcoplasmic/endoplasmic reticulum calcium ATPase 1  |
| 3ba6.1.A | 25.69                | X-ray  | 2.80Å      | 0.32                   | 0.85     | Sarcoplasmic/endoplasmic reticulum calcium ATPase 1  |
| 2c9m.1.A | 25.69                | X-ray  | 3.00Å      | 0.32                   | 0.85     | Sarcoplasmic/endoplasmic reticulum calcium ATPase 1  |
| 2oa0.1.A | 25.69                | X-ray  | 3.40Å      | 0.32                   | 0.85     | Sarcoplasmic/endoplasmic reticulum calcium ATPase 1  |

**Table S6.** List of conserved catalytic domains between the *A. oryzae* and *N. crassa* H<sup>+</sup>-ATPases with percentage of identity

|                                            | <i>N. crassa</i> H <sup>+</sup> -ATPase |                | <i>A. oryzae</i> H <sup>+</sup> -ATPase |                | Multiple alignment* |                  |
|--------------------------------------------|-----------------------------------------|----------------|-----------------------------------------|----------------|---------------------|------------------|
|                                            | Region                                  | Residue number | Region                                  | Residue number | Identical residue   | Percent identity |
| N-terminal extension                       |                                         |                | r1-46                                   | 46             | 0                   | 0.00             |
| <b>Activator (A)-domain total</b>          |                                         | <b>220</b>     |                                         | <b>184</b>     | <b>118</b>          | <b>64.13</b>     |
| A-domain (1)                               | r1-110                                  | 110            | r47-121                                 | 75             | 43                  | 55.13            |
| A-domain (2)                               | r175-284                                | 110            | r186-294                                | 109            | 75                  | 68.18            |
| <b>Phosphorylation (P)-domain total</b>    |                                         | <b>165</b>     |                                         | <b>165</b>     | <b>152</b>          | <b>92.12</b>     |
| P-domain (1)                               | r357-386                                | 30             | r367-396                                | 30             | 28                  | 93.33            |
| P-domain (2)                               | r535-669                                | 135            | r545-679                                | 135            | 124                 | 91.85            |
| <b>Nucleotide-binding (N)-domain total</b> | <b>r387-534</b>                         | <b>148</b>     | <b>r397-544</b>                         | <b>148</b>     | <b>107</b>          | <b>72.30</b>     |
| <b>Transmembrane (M)-domain total</b>      |                                         | <b>349</b>     |                                         | <b>349</b>     | <b>281</b>          | <b>80.52</b>     |
| M-domain (1)                               | r111-174                                | 64             | r122-185                                | 64             | 52                  | 81.25            |
| M-domain (2)                               | r285-356                                | 72             | r295-366                                | 72             | 63                  | 87.50            |
| M-domain (3)                               | r670-884                                | 213            | r680-892                                | 213            | 166                 | 77.93            |
| <b>Regulatory (R)-domain total</b>         | <b>r885-920</b>                         | <b>38</b>      | <b>r893-930</b>                         | <b>38</b>      | <b>23</b>           | <b>60.53</b>     |
| C-terminal extension                       |                                         |                | r931-943                                | 13             | 0                   | 0.00             |
| <b>Total conserved region</b>              |                                         | <b>920</b>     |                                         | <b>943</b>     | <b>681</b>          | <b>76.69</b>     |

\*CLUSTALW was run on NPS@server



**Table S7.** List of average RMSD over the equilibrium of five principal regions in *A. oryzae* and *N. crassa* H<sup>+</sup>-ATPases

| Region                        | <i>Aspergillus oryzae</i> H <sup>+</sup> -ATPase | <i>Neurospora crassa</i> H <sup>+</sup> -ATPase |
|-------------------------------|--------------------------------------------------|-------------------------------------------------|
| Activator (A)-domain          | 1.14±0.034                                       | 1.05±0.038                                      |
| Phosphorylation (P)-domain    | 0.48±0.011                                       | 0.44±0.015                                      |
| Nucleotide-binding (N)-domain | 0.59±0.012                                       | 0.71±0.047                                      |
| Transmembrane (M)-domain      | 0.71±0.013                                       | 0.73±0.017                                      |
| Regulatory (R)-domain         | 0.91±0.031                                       | 0.73±0.080                                      |
| Global structure              | 1.11±0.031                                       | 1.14±0.036                                      |

**Table S8.** Comparable RMSF between *A. oryzae* and *N. crassa* H<sup>+</sup>-ATPases

| <i>Neurospora crassa</i> H <sup>+</sup> -ATPase |        | <i>Aspergillus oryzae</i> H <sup>+</sup> -ATPase |        |
|-------------------------------------------------|--------|--------------------------------------------------|--------|
| Residue                                         | RMSF   | Residue                                          | RMSF   |
| VAL37                                           | 0.2736 | VAL47                                            | 0.8555 |
| GLU38                                           | 0.269  | GLU48                                            | 0.8357 |
| ASP39                                           | 0.2522 | ASP49                                            | 0.7861 |
| ASP40                                           | 0.2183 | GLY50                                            | 0.7471 |
| GLU41                                           | 0.1851 | GLU51                                            | 0.7041 |
| ASP42                                           | 0.1806 | ASP52                                            | 0.6627 |
| -                                               |        | VAL53                                            | 0.6246 |
| GLU43                                           | 0.1926 | GLU54                                            | 0.7187 |
| ASP44                                           | 0.1801 | ASN55                                            | 0.6676 |
| ILE45                                           | 0.2241 | ILE56                                            | 0.6071 |
| ASP46                                           | 0.2872 | ASP57                                            | 0.5688 |
| ALA47                                           | 0.2808 | THR58                                            | 0.549  |
| LEU48                                           | 0.2431 | LEU59                                            | 0.4859 |
| ILE49                                           | 0.29   | ILE60                                            | 0.3621 |
| GLU50                                           | 0.3604 | GLU61                                            | 0.3617 |
| ASP51                                           | 0.4191 | GLU62                                            | 0.26   |
| LEU52                                           | 0.5476 | LEU63                                            | 0.3145 |
| GLU53                                           | 0.5065 | GLU64                                            | 0.2732 |
| SER54                                           | 0.5867 | SER65                                            | 0.277  |
| HIS55                                           | 0.601  | LEU66                                            | 0.264  |
| ASP56                                           | 0.6147 | ASP67                                            | 0.2633 |
| -                                               |        | GLY68                                            | 0.3786 |
| -                                               |        | ASN69                                            | 0.4    |
| -                                               |        | LEU70                                            | 0.482  |
| GLY57                                           | 0.6798 | ASP71                                            | 0.4741 |
| HIS58                                           | 0.6456 | TYR72                                            | 0.4707 |
| ASP59                                           | 0.6938 | ASN73                                            | 0.4463 |
| ALA60                                           | 0.8036 | ASP74                                            | 0.3927 |
| GLU61                                           | 0.8563 | SER75                                            | 0.4165 |
| GLU62                                           | 0.9386 | GLY76                                            | 0.4685 |
| GLU63                                           | 0.9314 | GLN77                                            | 0.5618 |
| GLU64                                           | 1.0766 | ASP78                                            | 0.5634 |
| GLU65                                           | 1.0101 | GLU79                                            | 0.4859 |
| GLU66                                           | 0.9412 | LYS80                                            | 0.4685 |
| ALA67                                           | 0.9052 | SER81                                            | 0.4459 |
| THR68                                           | 0.7484 | THR82                                            | 0.4278 |
| PRO69                                           | 0.7231 | PRO83                                            | 0.4374 |
| GLY70                                           | 0.6463 | -                                                |        |
| GLY71                                           | 0.5547 | -                                                |        |

|       |        |       |        |
|-------|--------|-------|--------|
| GLY72 | 0.492  | -     |        |
| ARG73 | 0.4782 | CYS84 | 0.4418 |
| VAL74 | 0.4066 | CYS85 | 0.4677 |

| <i>Neurospora crassa</i> H <sup>+</sup> -ATPase |        | <i>Aspergillus oryzae</i> H <sup>+</sup> -ATPase |        |
|-------------------------------------------------|--------|--------------------------------------------------|--------|
| Residue                                         | RMSF   | Residue                                          | RMSF   |
| VAL75                                           | 0.4131 | ILE86                                            | 0.4439 |
| PRO76                                           | 0.3607 | SER87                                            | 0.392  |
| GLU77                                           | 0.3832 | GLU88                                            | 0.2747 |
| ASP78                                           | 0.4007 | GLU89                                            | 0.2925 |
| MET79                                           | 0.3476 | LEU90                                            | 0.282  |
| LEU80                                           | 0.292  | LEU91                                            | 0.2689 |
| GLN81                                           | 0.3238 | GLN92                                            | 0.2297 |
| THR82                                           | 0.2769 | THR93                                            | 0.2529 |
| ASP83                                           | 0.3176 | ASP94                                            | 0.2419 |
| THR84                                           | 0.2667 | PRO95                                            | 0.2217 |
| ARG85                                           | 0.2971 | SER96                                            | 0.2407 |
| VAL86                                           | 0.2311 | THR97                                            | 0.2843 |
| GLY87                                           | 0.3209 | GLY98                                            | 0.3702 |
| LEU88                                           | 0.2546 | LEU99                                            | 0.2503 |
| THR89                                           | 0.256  | THR100                                           | 0.2797 |
| SER90                                           | 0.2497 | GLU101                                           | 0.2797 |
| GLU91                                           | 0.2642 | PRO102                                           | 0.292  |
| GLU92                                           | 0.2261 | GLU103                                           | 0.2495 |
| VAL93                                           | 0.1958 | VAL104                                           | 0.2104 |
| VAL94                                           | 0.2283 | LEU105                                           | 0.2229 |
| GLN95                                           | 0.234  | LEU106                                           | 0.2358 |
| ARG96                                           | 0.1894 | ARG107                                           | 0.2039 |
| ARG97                                           | 0.2076 | ARG108                                           | 0.1763 |
| ARG98                                           | 0.2606 | LYS109                                           | 0.199  |
| LYS99                                           | 0.2258 | LYS110                                           | 0.2232 |
| TYR100                                          | 0.1871 | TYR111                                           | 0.1919 |
| GLY101                                          | 0.2146 | GLY112                                           | 0.1764 |
| LEU102                                          | 0.2162 | LEU113                                           | 0.176  |
| ASN103                                          | 0.2187 | ASN114                                           | 0.2267 |
| GLN104                                          | 0.2057 | GLN115                                           | 0.2311 |
| MET105                                          | 0.2107 | MET116                                           | 0.2022 |
| LYS106                                          | 0.1663 | LYS117                                           | 0.1914 |
| GLU107                                          | 0.1371 | GLU118                                           | 0.2013 |
| GLU108                                          | 0.1245 | GLU119                                           | 0.2382 |
| LYS109                                          | 0.1469 | LYS120                                           | 0.2499 |
| GLU110                                          | 0.1394 | GLU121                                           | 0.2199 |
| ASN111                                          | 0.1221 | ASN122                                           | 0.1833 |
| HIS112                                          | 0.1482 | LEU123                                           | 0.1807 |

|                                                      |             |                                                       |             |
|------------------------------------------------------|-------------|-------------------------------------------------------|-------------|
| PHE113                                               | 0.1163      | ILE124                                                | 0.1734      |
| LEU114                                               | 0.1454      | LEU125                                                | 0.1802      |
| LYS115                                               | 0.1622      | LYS126                                                | 0.2298      |
| PHE116                                               | 0.1448      | PHE127                                                | 0.2062      |
| LEU117                                               | 0.1331      | LEU128                                                | 0.1599      |
| GLY118                                               | 0.1497      | SER129                                                | 0.2172      |
| <b><i>Neurospora crassa</i> H<sup>+</sup>-ATPase</b> |             | <b><i>Aspergillus oryzae</i> H<sup>+</sup>-ATPase</b> |             |
| <b>Residue</b>                                       | <b>RMSF</b> | <b>Residue</b>                                        | <b>RMSF</b> |
| PHE119                                               | 0.1707      | TYR130                                                | 0.247       |
| PHE120                                               | 0.1672      | PHE131                                                | 0.1817      |
| VAL121                                               | 0.1696      | VAL132                                                | 0.2236      |
| GLY122                                               | 0.1901      | GLY133                                                | 0.3045      |
| PRO123                                               | 0.1937      | PRO134                                                | 0.309       |
| ILE124                                               | 0.1772      | VAL135                                                | 0.1996      |
| GLN125                                               | 0.183       | GLN136                                                | 0.2279      |
| PHE126                                               | 0.2085      | PHE137                                                | 0.2612      |
| VAL127                                               | 0.2066      | VAL138                                                | 0.2311      |
| MET128                                               | 0.1845      | MET139                                                | 0.215       |
| GLU129                                               | 0.2018      | GLU140                                                | 0.2511      |
| GLY130                                               | 0.2256      | ALA141                                                | 0.2485      |
| ALA131                                               | 0.2125      | ALA142                                                | 0.2564      |
| ALA132                                               | 0.2036      | ALA143                                                | 0.3212      |
| VAL133                                               | 0.2436      | ILE144                                                | 0.414       |
| LEU134                                               | 0.3206      | LEU145                                                | 0.4067      |
| ALA135                                               | 0.5035      | ALA146                                                | 0.4637      |
| ALA136                                               | 0.488       | ALA147                                                | 0.4634      |
| GLY137                                               | 0.5238      | GLY148                                                | 0.3983      |
| LEU138                                               | 0.7222      | LEU149                                                | 0.2729      |
| GLU139                                               | 0.8428      | GLN150                                                | 0.3147      |
| ASP140                                               | 0.7469      | ASP151                                                | 0.2767      |
| TRP141                                               | 0.6256      | TRP152                                                | 0.2625      |
| VAL142                                               | 0.3862      | VAL153                                                | 0.244       |
| ASP143                                               | 0.3282      | ASP154                                                | 0.2228      |
| PHE144                                               | 0.2069      | PHE155                                                | 0.211       |
| GLY145                                               | 0.1781      | GLY156                                                | 0.2183      |
| VAL146                                               | 0.149       | VAL157                                                | 0.2024      |
| ILE147                                               | 0.1432      | ILE158                                                | 0.1904      |
| CYS148                                               | 0.1616      | CYS159                                                | 0.2175      |
| GLY149                                               | 0.1584      | ALA160                                                | 0.2212      |
| LEU150                                               | 0.1334      | LEU161                                                | 0.2313      |
| LEU151                                               | 0.1424      | LEU162                                                | 0.2565      |
| LEU152                                               | 0.157       | ILE163                                                | 0.3139      |
| LEU153                                               | 0.1405      | LEU164                                                | 0.3409      |

|        |        |        |        |
|--------|--------|--------|--------|
| ASN154 | 0.1261 | ASN165 | 0.3106 |
| ALA155 | 0.188  | ALA166 | 0.2919 |
| VAL156 | 0.2495 | SER167 | 0.3832 |
| VAL157 | 0.2193 | VAL168 | 0.4257 |
| GLY158 | 0.1529 | GLY169 | 0.3647 |
| PHE159 | 0.1511 | PHE170 | 0.2033 |
| VAL160 | 0.1455 | ILE171 | 0.1877 |
| GLN161 | 0.1315 | GLN172 | 0.1833 |
| GLU162 | 0.1178 | GLU173 | 0.1796 |

| <i>Neurospora crassa</i> H <sup>+</sup> -ATPase |        | <i>Aspergillus oryzae</i> H <sup>+</sup> -ATPase |        |
|-------------------------------------------------|--------|--------------------------------------------------|--------|
| Residue                                         | RMSF   | Residue                                          | RMSF   |
| PHE163                                          | 0.1586 | PHE174                                           | 0.1495 |
| GLN164                                          | 0.1481 | GLN175                                           | 0.1761 |
| ALA165                                          | 0.187  | ALA176                                           | 0.1885 |
| GLY166                                          | 0.1799 | GLY177                                           | 0.3203 |
| SER167                                          | 0.2251 | SER178                                           | 0.3454 |
| ILE168                                          | 0.1737 | ILE179                                           | 0.2502 |
| VAL169                                          | 0.3292 | VAL180                                           | 0.2851 |
| ASP170                                          | 0.2484 | ASP181                                           | 0.199  |
| GLU171                                          | 0.2029 | GLU182                                           | 0.1976 |
| LEU172                                          | 0.1914 | LEU183                                           | 0.1796 |
| LYS173                                          | 0.1649 | LYS184                                           | 0.1452 |
| LYS174                                          | 0.1524 | LYS185                                           | 0.1456 |
| THR175                                          | 0.1354 | THR186                                           | 0.1481 |
| LEU176                                          | 0.1327 | LEU187                                           | 0.149  |
| ALA177                                          | 0.1142 | ALA188                                           | 0.1553 |
| LEU178                                          | 0.116  | LEU189                                           | 0.1373 |
| LYS179                                          | 0.1132 | LYS190                                           | 0.1354 |
| ALA180                                          | 0.107  | ALA191                                           | 0.1343 |
| VAL181                                          | 0.1057 | VAL192                                           | 0.1329 |
| VAL182                                          | 0.1123 | VAL193                                           | 0.1482 |
| LEU183                                          | 0.1213 | LEU194                                           | 0.1563 |
| ARG184                                          | 0.1669 | ARG195                                           | 0.1822 |
| ASP185                                          | 0.2135 | ASN196                                           | 0.2148 |
| GLY186                                          | 0.2045 | SER197                                           | 0.1883 |
| THR187                                          | 0.1577 | HIS198                                           | 0.1612 |
| LEU188                                          | 0.1295 | LEU199                                           | 0.133  |
| LYS189                                          | 0.1344 | ALA200                                           | 0.1375 |
| GLU190                                          | 0.1307 | GLU201                                           | 0.1272 |
| ILE191                                          | 0.1243 | VAL202                                           | 0.141  |
| GLU192                                          | 0.1146 | ASP203                                           | 0.1492 |
| ALA193                                          | 0.1151 | ALA204                                           | 0.1894 |
| PRO194                                          | 0.1429 | SER205                                           | 0.2046 |

|        |        |        |        |
|--------|--------|--------|--------|
| GLU195 | 0.1402 | ASP206 | 0.2043 |
| VAL196 | 0.1246 | VAL207 | 0.1901 |
| VAL197 | 0.1452 | VAL208 | 0.1841 |
| PRO198 | 0.1328 | PRO209 | 0.1784 |
| GLY199 | 0.135  | GLY210 | 0.183  |
| ASP200 | 0.1543 | ASP211 | 0.177  |
| ILE201 | 0.1215 | VAL212 | 0.1521 |
| LEU202 | 0.0992 | LEU213 | 0.143  |
| GLN203 | 0.0955 | GLU214 | 0.1451 |
| VAL204 | 0.0898 | ILE215 | 0.1429 |
| GLU205 | 0.0956 | GLU216 | 0.1378 |
| GLU206 | 0.0934 | GLU217 | 0.1382 |

| <i>Neurospora crassa</i> H <sup>+</sup> -ATPase |        | <i>Aspergillus oryzae</i> H <sup>+</sup> -ATPase |        |
|-------------------------------------------------|--------|--------------------------------------------------|--------|
| Residue                                         | RMSF   | Residue                                          | RMSF   |
| GLY207                                          | 0.0962 | GLY218                                           | 0.1421 |
| THR208                                          | 0.0852 | THR219                                           | 0.13   |
| ILE209                                          | 0.0906 | ILE220                                           | 0.126  |
| ILE210                                          | 0.0902 | ILE221                                           | 0.122  |
| PRO211                                          | 0.1116 | PRO222                                           | 0.1328 |
| ALA212                                          | 0.1088 | ALA223                                           | 0.1384 |
| ASP213                                          | 0.1061 | ASP224                                           | 0.1425 |
| GLY214                                          | 0.1097 | GLY225                                           | 0.1536 |
| ARG215                                          | 0.1193 | ARG226                                           | 0.1588 |
| ILE216                                          | 0.1247 | ILE227                                           | 0.153  |
| VAL217                                          | 0.1447 | LEU228                                           | 0.1874 |
| THR218                                          | 0.1929 | SER229                                           | 0.2028 |
| ASP219                                          | 0.2222 | SER230                                           | 0.2248 |
| ASP220                                          | 0.1693 | SER231                                           | 0.2085 |
| ALA221                                          | 0.1306 | VAL232                                           | 0.1913 |
| PHE222                                          | 0.1258 | -                                                |        |
| LEU223                                          | 0.1112 | LEU233                                           | 0.1555 |
| GLN224                                          | 0.1081 | GLN234                                           | 0.1655 |
| VAL225                                          | 0.1017 | VAL235                                           | 0.1534 |
| ASP226                                          | 0.1079 | ASP236                                           | 0.1716 |
| GLN227                                          | 0.1321 | GLN237                                           | 0.1919 |
| SER228                                          | 0.1987 | SER238                                           | 0.243  |
| ALA229                                          | 0.389  | GLY239                                           | 0.2554 |
| LEU230                                          | 0.451  | ILE240                                           | 0.2112 |
| THR231                                          | 0.4475 | THR241                                           | 0.2904 |
| GLY232                                          | 0.4371 | GLY242                                           | 0.359  |
| GLU233                                          | 0.3021 | GLU243                                           | 0.3683 |
| SER234                                          | 0.2096 | SER244                                           | 0.3219 |
| LEU235                                          | 0.1504 | LEU245                                           | 0.2724 |

|        |        |        |        |
|--------|--------|--------|--------|
| ALA236 | 0.1318 | ALA246 | 0.2144 |
| VAL237 | 0.1264 | VAL247 | 0.2048 |
| ASP238 | 0.1297 | ASP248 | 0.2012 |
| LYS239 | 0.1261 | LYS249 | 0.1886 |
| HIS240 | 0.1417 | ALA250 | 0.2102 |
| LYS241 | 0.1497 | ASP251 | 0.2056 |
| GLY242 | 0.152  | GLY252 | 0.2093 |
| ASP243 | 0.1356 | ASP253 | 0.192  |
| GLN244 | 0.1202 | THR254 | 0.1781 |
| VAL245 | 0.1111 | CYS255 | 0.1534 |
| PHE246 | 0.1203 | TYR256 | 0.1591 |
| ALA247 | 0.1062 | SER257 | 0.1356 |
| SER248 | 0.0984 | SER258 | 0.14   |
| SER249 | 0.0971 | SER259 | 0.1395 |
| ALA250 | 0.0956 | ALA260 | 0.1337 |

*Neurospora crassa* H<sup>+</sup>-ATPase

*Aspergillus oryzae* H<sup>+</sup>-ATPase

| Residue | RMSF   | Residue | RMSF   |
|---------|--------|---------|--------|
| VAL251  | 0.1074 | VAL261  | 0.1584 |
| LYS252  | 0.1309 | LYS262  | 0.1872 |
| ARG253  | 0.12   | HIS263  | 0.1547 |
| GLY254  | 0.1026 | GLY264  | 0.1461 |
| GLU255  | 0.1039 | HIS265  | 0.1421 |
| ALA256  | 0.1006 | ALA266  | 0.1557 |
| PHE257  | 0.1045 | ARG267  | 0.1376 |
| VAL258  | 0.1017 | LEU268  | 0.1351 |
| VAL259  | 0.1123 | VAL269  | 0.1534 |
| ILE260  | 0.109  | VAL270  | 0.1489 |
| THR261  | 0.1234 | THR271  | 0.1717 |
| ALA262  | 0.1208 | ALA272  | 0.1579 |
| THR263  | 0.1251 | THR273  | 0.1733 |
| GLY264  | 0.1257 | GLY274  | 0.2151 |
| ASP265  | 0.1396 | ASP275  | 0.1831 |
| ASN266  | 0.1291 | TYR276  | 0.228  |
| THR267  | 0.133  | THR277  | 0.153  |
| PHE268  | 0.1255 | PHE278  | 0.1635 |
| VAL269  | 0.1326 | VAL279  | 0.1652 |
| GLY270  | 0.1529 | GLY280  | 0.1763 |
| ARG271  | 0.1546 | ARG281  | 0.1731 |
| ALA272  | 0.2162 | ALA282  | 0.2238 |
| ALA273  | 0.2994 | ALA283  | 0.2512 |
| ALA274  | 0.2208 | ALA284  | 0.2528 |
| LEU275  | 0.1348 | LEU285  | 0.2058 |
| VAL276  | 0.177  | VAL286  | 0.1927 |

|        |        |        |        |
|--------|--------|--------|--------|
| ASN277 | 0.145  | SER287 | 0.1973 |
| ALA278 | 0.17   | ALA288 | 0.1858 |
| ALA279 | 0.2143 | ALA289 | 0.1853 |
| SER280 | 0.2324 | THR290 | 0.1865 |
| GLY281 | 0.2133 | SER291 | 0.2499 |
| GLY282 | 0.2774 | GLY292 | 0.2691 |
| SER283 | 0.2231 | THR293 | 0.2479 |
| GLY284 | 0.2227 | GLY294 | 0.231  |
| HIS285 | 0.148  | HIS295 | 0.2034 |
| PHE286 | 0.1211 | PHE296 | 0.1763 |
| THR287 | 0.1157 | THR297 | 0.1779 |
| GLU288 | 0.1169 | GLU298 | 0.1774 |
| VAL289 | 0.1079 | VAL299 | 0.1584 |
| LEU290 | 0.1055 | LEU300 | 0.1517 |
| ASN291 | 0.1141 | ASN301 | 0.1805 |
| GLY292 | 0.1159 | GLY302 | 0.1588 |
| ILE293 | 0.1057 | ILE303 | 0.1328 |
| GLY294 | 0.101  | SER304 | 0.1314 |

*Neurospora crassa* H<sup>+</sup>-ATPase

*Aspergillus oryzae* H<sup>+</sup>-ATPase

| Residue | RMSF   | Residue | RMSF   |
|---------|--------|---------|--------|
| THR295  | 0.1099 | ILE305  | 0.1294 |
| ILE296  | 0.1128 | VAL306  | 0.1133 |
| LEU297  | 0.0974 | LEU307  | 0.1461 |
| LEU298  | 0.0979 | LEU308  | 0.1798 |
| ILE299  | 0.1089 | VAL309  | 0.1794 |
| LEU300  | 0.1063 | LEU310  | 0.1662 |
| VAL301  | 0.0968 | VAL311  | 0.1948 |
| ILE302  | 0.1071 | ILE312  | 0.2592 |
| PHE303  | 0.1228 | MET313  | 0.1893 |
| THR304  | 0.1177 | THR314  | 0.1285 |
| LEU305  | 0.1129 | LEU315  | 0.1445 |
| LEU306  | 0.1352 | LEU316  | 0.1622 |
| ILE307  | 0.1496 | VAL317  | 0.1586 |
| VAL308  | 0.1439 | VAL318  | 0.1774 |
| TRP309  | 0.1515 | TRP319  | 0.2136 |
| VAL310  | 0.1796 | VAL320  | 0.2231 |
| SER311  | 0.2003 | SER321  | 0.2227 |
| SER312  | 0.2465 | SER322  | 0.2836 |
| PHE313  | 0.2343 | PHE323  | 0.2624 |
| TYR314  | 0.1824 | TYR324  | 0.2947 |
| ARG315  | 0.1791 | ARG325  | 0.2823 |
| SER316  | 0.1819 | SER326  | 0.3274 |
| ASN317  | 0.1648 | ASN327  | 0.3013 |



|        |        |        |        |
|--------|--------|--------|--------|
| PRO318 | 0.1879 | GLY328 | 0.3096 |
| ILE319 | 0.1882 | ILE329 | 0.2832 |
| VAL320 | 0.1835 | VAL330 | 0.22   |
| GLN321 | 0.1589 | THR331 | 0.1787 |
| ILE322 | 0.1455 | ILE332 | 0.1776 |
| LEU323 | 0.1533 | LEU333 | 0.1735 |
| GLU324 | 0.1454 | GLU334 | 0.1471 |
| PHE325 | 0.1223 | PHE335 | 0.1322 |
| THR326 | 0.1216 | THR336 | 0.1457 |
| LEU327 | 0.1305 | LEU337 | 0.1309 |
| ALA328 | 0.1184 | ALA338 | 0.1042 |
| ILE329 | 0.1032 | ILE339 | 0.1148 |
| THR330 | 0.1211 | THR340 | 0.1333 |
| ILE331 | 0.1339 | MET341 | 0.1236 |
| ILE332 | 0.121  | ILE342 | 0.0985 |
| GLY333 | 0.0927 | GLY343 | 0.0913 |
| VAL334 | 0.0918 | VAL344 | 0.0995 |
| PRO335 | 0.0966 | PRO345 | 0.1042 |
| VAL336 | 0.1146 | VAL346 | 0.1197 |
| GLY337 | 0.1135 | GLY347 | 0.1249 |
| LEU338 | 0.1055 | LEU348 | 0.1375 |

| <i>Neurospora crassa</i> H <sup>+</sup> -ATPase |        | <i>Aspergillus oryzae</i> H <sup>+</sup> -ATPase |        |
|-------------------------------------------------|--------|--------------------------------------------------|--------|
| Residue                                         | RMSF   | Residue                                          | RMSF   |
| PRO339                                          | 0.1086 | PRO349                                           | 0.1294 |
| ALA340                                          | 0.0967 | ALA350                                           | 0.1253 |
| VAL341                                          | 0.0912 | VAL351                                           | 0.135  |
| VAL342                                          | 0.104  | VAL352                                           | 0.1393 |
| THR343                                          | 0.1155 | THR353                                           | 0.1487 |
| THR344                                          | 0.1258 | THR354                                           | 0.1436 |
| THR345                                          | 0.0975 | THR355                                           | 0.1525 |
| MET346                                          | 0.0909 | MET356                                           | 0.1609 |
| ALA347                                          | 0.117  | ALA357                                           | 0.1448 |
| VAL348                                          | 0.1172 | VAL358                                           | 0.1232 |
| GLY349                                          | 0.095  | GLY359                                           | 0.1275 |
| ALA350                                          | 0.1024 | ALA360                                           | 0.1449 |
| ALA351                                          | 0.1167 | ALA361                                           | 0.1366 |
| TYR352                                          | 0.1044 | TYR362                                           | 0.1158 |
| LEU353                                          | 0.0923 | LEU363                                           | 0.1186 |
| ALA354                                          | 0.1123 | ALA364                                           | 0.1388 |
| LYS355                                          | 0.1289 | LYS365                                           | 0.1385 |
| LYS356                                          | 0.1183 | LYS366                                           | 0.1278 |
| LYS357                                          | 0.1132 | LYS367                                           | 0.1403 |
| ALA358                                          | 0.1007 | ALA368                                           | 0.128  |

|        |        |        |        |
|--------|--------|--------|--------|
| ILE359 | 0.0969 | ILE369 | 0.1334 |
| VAL360 | 0.0956 | VAL370 | 0.1367 |
| GLN361 | 0.0983 | GLN371 | 0.1586 |
| LYS362 | 0.096  | ARG372 | 0.2018 |
| LEU363 | 0.1026 | LEU373 | 0.2059 |
| SER364 | 0.112  | SER374 | 0.2127 |
| ALA365 | 0.0993 | ALA375 | 0.19   |
| ILE366 | 0.0955 | ILE376 | 0.1814 |
| GLU367 | 0.0948 | GLU377 | 0.1576 |
| SER368 | 0.1013 | SER378 | 0.1299 |
| LEU369 | 0.0896 | LEU379 | 0.14   |
| ALA370 | 0.0924 | ALA380 | 0.123  |
| GLY371 | 0.0978 | GLY381 | 0.1151 |
| VAL372 | 0.0829 | VAL382 | 0.1004 |
| GLU373 | 0.0782 | GLU383 | 0.0934 |
| ILE374 | 0.0753 | ILE384 | 0.0857 |
| LEU375 | 0.0713 | LEU385 | 0.0793 |
| CYS376 | 0.0742 | CYS386 | 0.0798 |
| SER377 | 0.0762 | SER387 | 0.0756 |
| ASP378 | 0.0735 | ASP388 | 0.0784 |
| LYS379 | 0.0838 | LYS389 | 0.0826 |
| THR380 | 0.1049 | THR390 | 0.0896 |
| GLY381 | 0.1117 | GLY391 | 0.0866 |
| THR382 | 0.092  | THR392 | 0.0786 |

*Neurospora crassa* H<sup>+</sup>-ATPase

*Aspergillus oryzae* H<sup>+</sup>-ATPase

| Residue | RMSF   | Residue | RMSF   |
|---------|--------|---------|--------|
| LEU383  | 0.0869 | LEU393  | 0.0821 |
| THR384  | 0.0975 | THR394  | 0.0953 |
| LYS385  | 0.1014 | ARG395  | 0.1139 |
| ASN386  | 0.137  | ASN396  | 0.1142 |
| LYS387  | 0.1807 | LYS397  | 0.1097 |
| LEU388  | 0.1905 | LEU398  | 0.1162 |
| SER389  | 0.1938 | SER399  | 0.1226 |
| LEU390  | 0.167  | LEU400  | 0.1253 |
| HIS391  | 0.1253 | ALA401  | 0.1364 |
| ASP392  | 0.1614 | GLU402  | 0.1386 |
| PRO393  | 0.11   | PRO403  | 0.1308 |
| TYR394  | 0.1291 | TYR404  | 0.1497 |
| THR395  | 0.145  | THR405  | 0.1583 |
| VAL396  | 0.1864 | VAL406  | 0.1795 |
| ALA397  | 0.2309 | PRO407  | 0.2087 |
| GLY398  | 0.2963 | GLY408  | 0.2199 |
| VAL399  | 0.2957 | VAL409  | 0.1945 |

|        |        |        |        |
|--------|--------|--------|--------|
| ASP400 | 0.2644 | THR410 | 0.1768 |
| PRO401 | 0.2074 | SER411 | 0.1944 |
| GLU402 | 0.1984 | GLU412 | 0.1542 |
| ASP403 | 0.1809 | GLU413 | 0.1329 |
| LEU404 | 0.167  | LEU414 | 0.1188 |
| MET405 | 0.171  | MET415 | 0.1147 |
| LEU406 | 0.1698 | LEU416 | 0.1193 |
| THR407 | 0.1566 | THR417 | 0.1127 |
| ALA408 | 0.1594 | ALA418 | 0.1066 |
| CYS409 | 0.1441 | CYS419 | 0.1166 |
| LEU410 | 0.1347 | LEU420 | 0.1209 |
| ALA411 | 0.1355 | ALA421 | 0.1169 |
| ALA412 | 0.1471 | ALA422 | 0.1169 |
| SER413 | 0.1453 | SER423 | 0.1242 |
| ARG414 | 0.1328 | ARG424 | 0.1106 |
| LYS415 | 0.1384 | LYS425 | 0.1216 |
| LYS416 | 0.136  | LYS426 | 0.1104 |
| LYS417 | 0.129  | LYS427 | 0.1131 |
| GLY418 | 0.1598 | GLY428 | 0.1214 |
| ILE419 | 0.152  | MET429 | 0.1253 |
| ASP420 | 0.1579 | ASP430 | 0.1265 |
| ALA421 | 0.1657 | PRO431 | 0.1483 |
| ILE422 | 0.1637 | ILE432 | 0.1197 |
| ASP423 | 0.1593 | ASP433 | 0.1373 |
| LYS424 | 0.1794 | ARG434 | 0.1606 |
| ALA425 | 0.196  | ALA435 | 0.1879 |
| PHE426 | 0.1937 | PHE436 | 0.1664 |

*Neurospora crassa* H<sup>+</sup>-ATPase

*Aspergillus oryzae* H<sup>+</sup>-ATPase

| Residue | RMSF   | Residue | RMSF   |
|---------|--------|---------|--------|
| LEU427  | 0.2034 | LEU437  | 0.1505 |
| LYS428  | 0.2314 | ARG438  | 0.18   |
| SER429  | 0.2441 | ALA439  | 0.1927 |
| LEU430  | 0.253  | LEU440  | 0.1742 |
| LYS431  | 0.2274 | LYS441  | 0.1978 |
| TYR432  | 0.2306 | GLY442  | 0.1841 |
| TYR433  | 0.1787 | TYR443  | 0.1567 |
| PRO434  | 0.1444 | PRO444  | 0.1676 |
| ARG435  | 0.1764 | GLU445  | 0.1601 |
| ALA436  | 0.1748 | ALA446  | 0.1579 |
| LYS437  | 0.1945 | LYS447  | 0.1926 |
| SER438  | 0.1915 | LYS448  | 0.1762 |
| VAL439  | 0.1525 | ALA449  | 0.1983 |
| LEU440  | 0.15   | LEU450  | 0.1798 |

|        |        |        |        |
|--------|--------|--------|--------|
| SER441 | 0.1384 | THR451 | 0.2039 |
| LYS442 | 0.1362 | GLN452 | 0.2034 |
| TYR443 | 0.1361 | TYR453 | 0.1738 |
| LYS444 | 0.1294 | LYS454 | 0.1854 |
| VAL445 | 0.122  | LYS455 | 0.1808 |
| LEU446 | 0.1295 | LEU456 | 0.1953 |
| GLN447 | 0.1374 | GLU457 | 0.1769 |
| PHE448 | 0.1401 | PHE458 | 0.1429 |
| HIS449 | 0.1403 | PHE459 | 0.1223 |
| PRO450 | 0.1705 | PRO460 | 0.1488 |
| PHE451 | 0.1327 | PHE461 | 0.1651 |
| ASP452 | 0.1337 | ASP462 | 0.1584 |
| PRO453 | 0.1312 | PRO463 | 0.2031 |
| VAL454 | 0.1388 | VAL464 | 0.1903 |
| SER455 | 0.1269 | SER465 | 0.1677 |
| LYS456 | 0.1145 | LYS466 | 0.1546 |
| LYS457 | 0.133  | LYS467 | 0.1612 |
| VAL458 | 0.1502 | VAL468 | 0.1409 |
| VAL459 | 0.1469 | THR469 | 0.1241 |
| ALA460 | 0.1393 | ALA470 | 0.1174 |
| VAL461 | 0.1392 | VAL471 | 0.1387 |
| VAL462 | 0.1361 | VAL472 | 0.1453 |
| GLU463 | 0.1509 | GLN473 | 0.1756 |
| SER464 | 0.1648 | SER474 | 0.1876 |
| PRO465 | 0.1693 | PRO475 | 0.2418 |
| GLN466 | 0.2347 | HIS476 | 0.2906 |
| GLY467 | 0.2409 | GLY477 | 0.3141 |
| GLU468 | 0.2309 | GLU478 | 0.2335 |
| ARG469 | 0.1983 | ARG479 | 0.1909 |
| ILE470 | 0.184  | ILE480 | 0.1519 |

| <i>Neurospora crassa</i> H <sup>+</sup> -ATPase |        | <i>Aspergillus oryzae</i> H <sup>+</sup> -ATPase |        |
|-------------------------------------------------|--------|--------------------------------------------------|--------|
| Residue                                         | RMSF   | Residue                                          | RMSF   |
| THR471                                          | 0.1665 | VAL481                                           | 0.14   |
| CYS472                                          | 0.1466 | CYS482                                           | 0.1201 |
| VAL473                                          | 0.1304 | MET483                                           | 0.1171 |
| LYS474                                          | 0.1146 | LYS484                                           | 0.1131 |
| GLY475                                          | 0.1074 | GLY485                                           | 0.1406 |
| ALA476                                          | 0.0959 | ALA486                                           | 0.169  |
| PRO477                                          | 0.093  | PRO487                                           | 0.1769 |
| LEU478                                          | 0.0935 | ILE488                                           | 0.2009 |
| PHE479                                          | 0.1001 | PHE489                                           | 0.1964 |
| VAL480                                          | 0.112  | VAL490                                           | 0.169  |
| LEU481                                          | 0.1019 | LEU491                                           | 0.1868 |

|                                                      |             |                                                       |             |
|------------------------------------------------------|-------------|-------------------------------------------------------|-------------|
| LYS482                                               | 0.1182      | ASN492                                                | 0.2184      |
| THR483                                               | 0.1626      | THR493                                                | 0.2298      |
| VAL484                                               | 0.3022      | VAL494                                                | 0.2253      |
| GLU485                                               | 0.3943      | LYS495                                                | 0.2321      |
| GLU486                                               | 0.6005      | LYS496                                                | 0.2251      |
| ASP487                                               | 0.7485      | ASP497                                                | 0.2549      |
| HIS488                                               | 0.7712      | HIS498                                                | 0.238       |
| PRO489                                               | 0.767       | PRO499                                                | 0.2539      |
| ILE490                                               | 0.7964      | ILE500                                                | 0.2291      |
| PRO491                                               | 0.5942      | SER501                                                | 0.2539      |
| GLU492                                               | 0.5062      | GLU502                                                | 0.2849      |
| GLU493                                               | 0.3406      | GLY503                                                | 0.2644      |
| VAL494                                               | 0.1778      | VAL504                                                | 0.2463      |
| ASP495                                               | 0.1724      | GLU505                                                | 0.2661      |
| GLN496                                               | 0.1705      | THR506                                                | 0.2656      |
| ALA497                                               | 0.156       | ALA507                                                | 0.2292      |
| TYR498                                               | 0.1294      | TYR508                                                | 0.2082      |
| LYS499                                               | 0.1243      | MET509                                                | 0.2326      |
| ASN500                                               | 0.1329      | SER510                                                | 0.2524      |
| LYS501                                               | 0.1178      | LYS511                                                | 0.2361      |
| VAL502                                               | 0.0966      | VAL512                                                | 0.2005      |
| ALA503                                               | 0.1095      | ALA513                                                | 0.2126      |
| GLU504                                               | 0.1199      | ASP514                                                | 0.2495      |
| PHE505                                               | 0.1003      | PHE515                                                | 0.2523      |
| ALA506                                               | 0.0899      | ALA516                                                | 0.2332      |
| THR507                                               | 0.1047      | VAL517                                                | 0.232       |
| ARG508                                               | 0.0975      | ARG518                                                | 0.2934      |
| GLY509                                               | 0.0973      | GLY519                                                | 0.3531      |
| PHE510                                               | 0.0841      | PHE520                                                | 0.2175      |
| ARG511                                               | 0.0889      | ARG521                                                | 0.1786      |
| SER512                                               | 0.1041      | SER522                                                | 0.1577      |
| LEU513                                               | 0.0916      | LEU523                                                | 0.1394      |
| GLY514                                               | 0.0986      | GLY524                                                | 0.1389      |
| <b><i>Neurospora crassa</i> H<sup>+</sup>-ATPase</b> |             | <b><i>Aspergillus oryzae</i> H<sup>+</sup>-ATPase</b> |             |
| <b>Residue</b>                                       | <b>RMSF</b> | <b>Residue</b>                                        | <b>RMSF</b> |
| VAL515                                               | 0.1185      | VAL525                                                | 0.1234      |
| ALA516                                               | 0.1268      | ALA526                                                | 0.1306      |
| ARG517                                               | 0.1441      | ARG527                                                | 0.1344      |
| LYS518                                               | 0.1709      | LYS528                                                | 0.1519      |
| ARG519                                               | 0.1862      | CYS529                                                | 0.1674      |
| GLY520                                               | 0.1939      | SER530                                                | 0.2147      |
| GLU521                                               | 0.252       | GLU531                                                | 0.2157      |
| GLY522                                               | 0.2215      | GLY532                                                | 0.2173      |

|        |        |        |        |
|--------|--------|--------|--------|
| SER523 | 0.1721 | GLU533 | 0.1791 |
| TRP524 | 0.1518 | TRP534 | 0.1964 |
| GLU525 | 0.1295 | GLU535 | 0.1841 |
| ILE526 | 0.1298 | ILE536 | 0.1722 |
| LEU527 | 0.1318 | LEU537 | 0.1478 |
| GLY528 | 0.1196 | GLY538 | 0.1477 |
| ILE529 | 0.123  | ILE539 | 0.1361 |
| MET530 | 0.0944 | MET540 | 0.1258 |
| PRO531 | 0.0979 | PRO541 | 0.1426 |
| CYS532 | 0.0915 | CYS542 | 0.1334 |
| MET533 | 0.1205 | SER543 | 0.143  |
| ASP534 | 0.1526 | ASP544 | 0.116  |
| PRO535 | 0.1443 | PRO545 | 0.1241 |
| PRO536 | 0.1189 | PRO546 | 0.11   |
| ARG537 | 0.1533 | ARG547 | 0.1088 |
| HIS538 | 0.1431 | HIS548 | 0.1111 |
| ASP539 | 0.1148 | ASP549 | 0.116  |
| THR540 | 0.1024 | THR550 | 0.1104 |
| TYR541 | 0.1119 | ALA551 | 0.1268 |
| LYS542 | 0.1117 | LYS552 | 0.1043 |
| THR543 | 0.0933 | THR553 | 0.0863 |
| VAL544 | 0.0899 | ILE554 | 0.0907 |
| CYS545 | 0.0986 | HIS555 | 0.094  |
| GLU546 | 0.0945 | GLU556 | 0.087  |
| ALA547 | 0.0867 | ALA557 | 0.0823 |
| LYS548 | 0.0927 | LYS558 | 0.0927 |
| THR549 | 0.097  | SER559 | 0.1028 |
| LEU550 | 0.089  | LEU560 | 0.1016 |
| GLY551 | 0.0914 | GLY561 | 0.1002 |
| LEU552 | 0.0856 | LEU562 | 0.0887 |
| SER553 | 0.0834 | SER563 | 0.0859 |
| ILE554 | 0.0803 | ILE564 | 0.0829 |
| LYS555 | 0.0811 | LYS565 | 0.0819 |
| MET556 | 0.0716 | MET566 | 0.0776 |
| LEU557 | 0.0676 | LEU567 | 0.0823 |
| THR558 | 0.0684 | THR568 | 0.0901 |

*Neurospora crassa* H<sup>+</sup>-ATPase

*Aspergillus oryzae* H<sup>+</sup>-ATPase

| Residue | RMSF   | Residue | RMSF   |
|---------|--------|---------|--------|
| GLY559  | 0.0788 | GLY569  | 0.1082 |
| ASP560  | 0.0716 | ASP570  | 0.1158 |
| ALA561  | 0.073  | ALA571  | 0.1203 |
| VAL562  | 0.0777 | VAL572  | 0.1234 |
| GLY563  | 0.0868 | GLY573  | 0.1387 |

|                                                      |             |                                                       |             |
|------------------------------------------------------|-------------|-------------------------------------------------------|-------------|
| ILE564                                               | 0.0804      | ILE574                                                | 0.1285      |
| ALA565                                               | 0.0746      | ALA575                                                | 0.1091      |
| ARG566                                               | 0.086       | ARG576                                                | 0.1178      |
| GLU567                                               | 0.0935      | GLU577                                                | 0.1203      |
| THR568                                               | 0.0878      | THR578                                                | 0.0993      |
| SER569                                               | 0.0859      | SER579                                                | 0.0973      |
| ARG570                                               | 0.1031      | ARG580                                                | 0.1162      |
| GLN571                                               | 0.1071      | GLN581                                                | 0.1092      |
| LEU572                                               | 0.0986      | LEU582                                                | 0.0997      |
| GLY573                                               | 0.0941      | GLY583                                                | 0.1134      |
| LEU574                                               | 0.0909      | LEU584                                                | 0.1081      |
| GLY575                                               | 0.119       | GLY585                                                | 0.2196      |
| THR576                                               | 0.1363      | THR586                                                | 0.381       |
| ASN577                                               | 0.1621      | ASN587                                                | 0.4752      |
| ILE578                                               | 0.1863      | VAL588                                                | 0.462       |
| TYR579                                               | 0.2119      | TYR589                                                | 0.4703      |
| ASN580                                               | 0.2098      | ASN590                                                | 0.4147      |
| ALA581                                               | 0.2175      | ALA591                                                | 0.4224      |
| GLU582                                               | 0.2297      | GLU592                                                | 0.3204      |
| ARG583                                               | 0.1808      | ARG593                                                | 0.2492      |
| LEU584                                               | 0.1209      | LEU594                                                | 0.2053      |
| GLY585                                               | 0.1084      | GLY595                                                | 0.1811      |
| LEU586                                               | 0.1232      | LEU596                                                | 0.1516      |
| GLY587                                               | 0.105       | GLY597                                                | 0.1376      |
| GLY588                                               | 0.1219      | GLY598                                                | 0.1385      |
| GLY589                                               | 0.1294      | LYS599                                                | 0.1345      |
| GLY590                                               | 0.0987      | GLY600                                                | 0.1246      |
| ASP591                                               | 0.0922      | THR601                                                | 0.1371      |
| MET592                                               | 0.0993      | MET602                                                | 0.1487      |
| PRO593                                               | 0.1142      | PRO603                                                | 0.2036      |
| GLY594                                               | 0.121       | GLY604                                                | 0.233       |
| SER595                                               | 0.1003      | SER605                                                | 0.1903      |
| GLU596                                               | 0.1142      | GLN606                                                | 0.1973      |
| VAL597                                               | 0.1074      | VAL607                                                | 0.1628      |
| TYR598                                               | 0.1255      | TYR608                                                | 0.1717      |
| ASP599                                               | 0.1249      | ASP609                                                | 0.1563      |
| PHE600                                               | 0.1078      | PHE610                                                | 0.1381      |
| VAL601                                               | 0.1014      | VAL611                                                | 0.1401      |
| GLU602                                               | 0.1016      | GLU612                                                | 0.1582      |
| <b><i>Neurospora crassa</i> H<sup>+</sup>-ATPase</b> |             | <b><i>Aspergillus oryzae</i> H<sup>+</sup>-ATPase</b> |             |
| <b>Residue</b>                                       | <b>RMSF</b> | <b>Residue</b>                                        | <b>RMSF</b> |
| ALA603                                               | 0.0994      | ALA613                                                | 0.1183      |
| ALA604                                               | 0.0982      | ALA614                                                | 0.1295      |

|        |        |        |        |
|--------|--------|--------|--------|
| ASP605 | 0.0898 | ASP615 | 0.105  |
| GLY606 | 0.0876 | GLY616 | 0.0951 |
| PHE607 | 0.0771 | PHE617 | 0.0975 |
| ALA608 | 0.0704 | ALA618 | 0.099  |
| GLU609 | 0.0778 | GLU619 | 0.1046 |
| VAL610 | 0.0848 | VAL620 | 0.0967 |
| PHE611 | 0.0784 | PHE621 | 0.103  |
| PRO612 | 0.0885 | PRO622 | 0.1004 |
| GLN613 | 0.0935 | GLN623 | 0.106  |
| HIS614 | 0.0862 | HIS624 | 0.0982 |
| LYS615 | 0.0817 | LYS625 | 0.0911 |
| TYR616 | 0.0904 | TYR626 | 0.0973 |
| ASN617 | 0.0948 | ASN627 | 0.1016 |
| VAL618 | 0.0876 | VAL628 | 0.0963 |
| VAL619 | 0.0886 | VAL629 | 0.0975 |
| GLU620 | 0.1011 | ASP630 | 0.1101 |
| ILE621 | 0.103  | ILE631 | 0.1095 |
| LEU622 | 0.0948 | LEU632 | 0.1038 |
| GLN623 | 0.0996 | GLN633 | 0.1133 |
| GLN624 | 0.117  | GLN634 | 0.1261 |
| ARG625 | 0.1174 | ARG635 | 0.1248 |
| GLY626 | 0.1099 | GLY636 | 0.127  |
| TYR627 | 0.096  | TYR637 | 0.108  |
| LEU628 | 0.0867 | LEU638 | 0.1033 |
| VAL629 | 0.0819 | VAL639 | 0.0934 |
| ALA630 | 0.0786 | ALA640 | 0.089  |
| MET631 | 0.0756 | MET641 | 0.0822 |
| THR632 | 0.0762 | THR642 | 0.0844 |
| GLY633 | 0.118  | GLY643 | 0.0953 |
| ASP634 | 0.1242 | ASP644 | 0.0968 |
| GLY635 | 0.1262 | GLY645 | 0.1144 |
| VAL636 | 0.1421 | VAL646 | 0.1063 |
| ASN637 | 0.1359 | ASN647 | 0.1008 |
| ASP638 | 0.1242 | ASP648 | 0.0944 |
| ALA639 | 0.113  | ALA649 | 0.1081 |
| PRO640 | 0.1065 | PRO650 | 0.1107 |
| SER641 | 0.0896 | SER651 | 0.0967 |
| LEU642 | 0.092  | LEU652 | 0.097  |
| LYS643 | 0.1002 | LYS653 | 0.1148 |
| LYS644 | 0.0934 | LYS654 | 0.1119 |
| ALA645 | 0.085  | ALA655 | 0.1019 |
| ASP646 | 0.0858 | ASP656 | 0.1087 |

*Neurospora crassa* H<sup>+</sup>-ATPase

*Aspergillus oryzae* H<sup>+</sup>-ATPase



| Residue | RMSF   | Residue | RMSF   |
|---------|--------|---------|--------|
| THR647  | 0.0808 | ALA657  | 0.102  |
| GLY648  | 0.0792 | GLY658  | 0.1019 |
| ILE649  | 0.0792 | ILE659  | 0.089  |
| ALA650  | 0.0817 | ALA660  | 0.0993 |
| VAL651  | 0.0824 | VAL661  | 0.116  |
| GLU652  | 0.0953 | GLU662  | 0.1204 |
| GLY653  | 0.1108 | GLY663  | 0.1083 |
| SER654  | 0.1426 | SER664  | 0.1239 |
| SER655  | 0.1397 | SER665  | 0.1396 |
| ASP656  | 0.1312 | ASP666  | 0.1439 |
| ALA657  | 0.1279 | ALA667  | 0.1187 |
| ALA658  | 0.1434 | ALA668  | 0.1085 |
| ARG659  | 0.1745 | ARG669  | 0.124  |
| SER660  | 0.1622 | THR670  | 0.1422 |
| ALA661  | 0.1869 | ALA671  | 0.1322 |
| ALA662  | 0.0833 | ALA672  | 0.1211 |
| ASP663  | 0.0866 | ASP673  | 0.1323 |
| ILE664  | 0.0842 | ILE674  | 0.1136 |
| VAL665  | 0.0809 | VAL675  | 0.1171 |
| PHE666  | 0.0792 | PHE676  | 0.1194 |
| LEU667  | 0.089  | LEU677  | 0.1253 |
| ALA668  | 0.0906 | ALA678  | 0.1264 |
| PRO669  | 0.0852 | PRO679  | 0.0909 |
| GLY670  | 0.0786 | GLY680  | 0.0823 |
| LEU671  | 0.0805 | LEU681  | 0.0803 |
| GLY672  | 0.0903 | SER682  | 0.0933 |
| ALA673  | 0.0897 | ALA683  | 0.0989 |
| ILE674  | 0.0831 | ILE684  | 0.0943 |
| ILE675  | 0.0853 | ILE685  | 0.0869 |
| ASP676  | 0.0905 | ASP686  | 0.0989 |
| ALA677  | 0.093  | ALA687  | 0.1151 |
| LEU678  | 0.089  | LEU688  | 0.1138 |
| LYS679  | 0.0887 | LYS689  | 0.1043 |
| THR680  | 0.0939 | THR690  | 0.1143 |
| SER681  | 0.0943 | SER691  | 0.1147 |
| ARG682  | 0.0885 | ARG692  | 0.0992 |
| GLN683  | 0.0891 | GLN693  | 0.0969 |
| ILE684  | 0.0983 | ILE694  | 0.1039 |
| PHE685  | 0.0938 | PHE695  | 0.0958 |
| HIS686  | 0.0807 | HIS696  | 0.0871 |
| ARG687  | 0.0847 | ARG697  | 0.0958 |
| MET688  | 0.0919 | MET698  | 0.0929 |

|                                                      |             |                                                       |             |
|------------------------------------------------------|-------------|-------------------------------------------------------|-------------|
| TYR689                                               | 0.0858      | HIS699                                                | 0.082       |
| ALA690                                               | 0.0798      | ALA700                                                | 0.085       |
| <b><i>Neurospora crassa</i> H<sup>+</sup>-ATPase</b> |             | <b><i>Aspergillus oryzae</i> H<sup>+</sup>-ATPase</b> |             |
| <b>Residue</b>                                       | <b>RMSF</b> | <b>Residue</b>                                        | <b>RMSF</b> |
| TYR691                                               | 0.0812      | TYR701                                                | 0.0835      |
| VAL692                                               | 0.0869      | VAL702                                                | 0.0768      |
| VAL693                                               | 0.0834      | VAL703                                                | 0.0752      |
| TYR694                                               | 0.0765      | TYR704                                                | 0.0793      |
| ARG695                                               | 0.077       | ARG705                                                | 0.0737      |
| ILE696                                               | 0.0732      | ILE706                                                | 0.0702      |
| ALA697                                               | 0.0778      | ALA707                                                | 0.0756      |
| LEU698                                               | 0.079       | LEU708                                                | 0.0721      |
| SER699                                               | 0.0743      | SER709                                                | 0.0709      |
| ILE700                                               | 0.0761      | LEU710                                                | 0.079       |
| HIS701                                               | 0.0882      | HIS711                                                | 0.0805      |
| LEU702                                               | 0.0808      | LEU712                                                | 0.0805      |
| GLU703                                               | 0.085       | GLU713                                                | 0.099       |
| ILE704                                               | 0.1039      | ILE714                                                | 0.1247      |
| PHE705                                               | 0.1029      | PHE715                                                | 0.1174      |
| LEU706                                               | 0.1078      | LEU716                                                | 0.1258      |
| GLY707                                               | 0.1267      | GLY717                                                | 0.1587      |
| LEU708                                               | 0.1368      | LEU718                                                | 0.1734      |
| TRP709                                               | 0.1367      | TRP719                                                | 0.1698      |
| ILE710                                               | 0.1526      | ILE720                                                | 0.2118      |
| ALA711                                               | 0.174       | ALA721                                                | 0.2503      |
| ILE712                                               | 0.1775      | ILE722                                                | 0.2561      |
| LEU713                                               | 0.1644      | MET723                                                | 0.2299      |
| ASN714                                               | 0.1677      | ASN724                                                | 0.2464      |
| ARG715                                               | 0.1476      | GLU725                                                | 0.2124      |
| SER716                                               | 0.1375      | SER726                                                | 0.1654      |
| LEU717                                               | 0.1201      | LEU727                                                | 0.1404      |
| ASN718                                               | 0.1072      | ASN728                                                | 0.1611      |
| ILE719                                               | 0.1162      | ILE729                                                | 0.1669      |
| GLU720                                               | 0.1178      | GLN730                                                | 0.1887      |
| LEU721                                               | 0.1068      | LEU731                                                | 0.158       |
| VAL722                                               | 0.1083      | VAL732                                                | 0.1387      |
| VAL723                                               | 0.1146      | VAL733                                                | 0.1442      |
| PHE724                                               | 0.1002      | PHE734                                                | 0.147       |
| ILE725                                               | 0.1052      | ILE735                                                | 0.1483      |
| ALA726                                               | 0.1285      | ALA736                                                | 0.1544      |
| ILE727                                               | 0.1179      | ILE737                                                | 0.1606      |
| PHE728                                               | 0.1024      | PHE738                                                | 0.1609      |
| ALA729                                               | 0.1023      | ALA739                                                | 0.1712      |

|        |        |        |        |
|--------|--------|--------|--------|
| ASP730 | 0.1118 | ASP740 | 0.153  |
| VAL731 | 0.1203 | ILE741 | 0.1348 |
| ALA732 | 0.1138 | ALA742 | 0.1464 |
| THR733 | 0.1077 | THR743 | 0.162  |
| LEU734 | 0.1191 | LEU744 | 0.1588 |

| <i>Neurospora crassa</i> H <sup>+</sup> -ATPase |        | <i>Aspergillus oryzae</i> H <sup>+</sup> -ATPase |        |
|-------------------------------------------------|--------|--------------------------------------------------|--------|
| Residue                                         | RMSF   | Residue                                          | RMSF   |
| ALA735                                          | 0.2147 | ALA745                                           | 0.1484 |
| ILE736                                          | 0.151  | ILE746                                           | 0.1446 |
| ALA737                                          | 0.1149 | ALA747                                           | 0.1518 |
| TYR738                                          | 0.0964 | TYR748                                           | 0.1306 |
| ASP739                                          | 0.0914 | ASP749                                           | 0.1238 |
| ASN740                                          | 0.0924 | LYS750                                           | 0.1291 |
| ALA741                                          | 0.0941 | ALA751                                           | 0.1507 |
| PRO742                                          | 0.0952 | PRO752                                           | 0.1236 |
| TYR743                                          | 0.0876 | TYR753                                           | 0.1126 |
| SER744                                          | 0.1027 | SER754                                           | 0.1174 |
| GLN745                                          | 0.1048 | ARG755                                           | 0.1044 |
| THR746                                          | 0.1071 | THR756                                           | 0.107  |
| PRO747                                          | 0.1156 | PRO757                                           | 0.1052 |
| VAL748                                          | 0.1098 | VAL758                                           | 0.1025 |
| LYS749                                          | 0.1074 | LYS759                                           | 0.1036 |
| TRP750                                          | 0.1308 | TRP760                                           | 0.109  |
| ASN751                                          | 0.1803 | ASN761                                           | 0.0986 |
| LEU752                                          | 0.2142 | LEU762                                           | 0.1064 |
| PRO753                                          | 0.2627 | PRO763                                           | 0.1189 |
| LYS754                                          | 0.1827 | ARG764                                           | 0.1263 |
| LEU755                                          | 0.13   | LEU765                                           | 0.1097 |
| TRP756                                          | 0.1095 | TRP766                                           | 0.0934 |
| GLY757                                          | 0.1382 | GLY767                                           | 0.1155 |
| MET758                                          | 0.1827 | MET768                                           | 0.1195 |
| SER759                                          | 0.1757 | SER769                                           | 0.1194 |
| VAL760                                          | 0.1042 | VAL770                                           | 0.1097 |
| LEU761                                          | 0.092  | LEU771                                           | 0.0928 |
| LEU762                                          | 0.1003 | LEU772                                           | 0.1007 |
| GLY763                                          | 0.1036 | GLY773                                           | 0.1094 |
| VAL764                                          | 0.091  | ILE774                                           | 0.0951 |
| VAL765                                          | 0.0841 | VAL775                                           | 0.0849 |
| LEU766                                          | 0.0895 | LEU776                                           | 0.0949 |
| ALA767                                          | 0.094  | ALA777                                           | 0.1005 |
| VAL768                                          | 0.0884 | ILE778                                           | 0.0933 |
| GLY769                                          | 0.0918 | GLY779                                           | 0.099  |
| THR770                                          | 0.0986 | THR780                                           | 0.1148 |

|        |        |        |        |
|--------|--------|--------|--------|
| TRP771 | 0.097  | TRP781 | 0.1096 |
| ILE772 | 0.0964 | VAL782 | 0.0964 |
| THR773 | 0.1084 | THR783 | 0.1028 |
| VAL774 | 0.1256 | LEU784 | 0.1263 |
| THR775 | 0.1227 | SER785 | 0.1285 |
| THR776 | 0.1217 | THR786 | 0.1182 |
| MET777 | 0.1352 | MET787 | 0.1187 |
| TYR778 | 0.1532 | LEU788 | 0.1369 |

| <i>Neurospora crassa</i> H <sup>+</sup> -ATPase |        | <i>Aspergillus oryzae</i> H <sup>+</sup> -ATPase |        |
|-------------------------------------------------|--------|--------------------------------------------------|--------|
| Residue                                         | RMSF   | Residue                                          | RMSF   |
| ALA779                                          | 0.1851 | SER789                                           | 0.1422 |
| GLN780                                          | 0.2619 | GLY790                                           | 0.1613 |
| GLY781                                          | 0.3584 | GLY791                                           | 0.199  |
| GLU782                                          | 0.391  | GLU792                                           | 0.2243 |
| ASN783                                          | 0.407  | GLN793                                           | 0.2519 |
| GLY784                                          | 0.4103 | GLY794                                           | 0.3123 |
| GLY785                                          | 0.3139 | GLY795                                           | 0.3526 |
| ILE786                                          | 0.2756 | ILE796                                           | 0.3234 |
| VAL787                                          | 0.237  | VAL797                                           | 0.2806 |
| GLN788                                          | 0.1885 | GLN798                                           | 0.2712 |
| ASN789                                          | 0.1699 | ASN799                                           | 0.3219 |
| PHE790                                          | 0.1452 | PHE800                                           | 0.3155 |
| GLY791                                          | 0.1617 | GLY801                                           | 0.2425 |
| ASN792                                          | 0.1419 | LYS802                                           | 0.1987 |
| MET793                                          | 0.1232 | ARG803                                           | 0.1691 |
| ASP794                                          | 0.1138 | ASP804                                           | 0.1877 |
| GLU795                                          | 0.1125 | GLU805                                           | 0.1939 |
| VAL796                                          | 0.1148 | VAL806                                           | 0.1658 |
| LEU797                                          | 0.1039 | LEU807                                           | 0.1311 |
| PHE798                                          | 0.1016 | PHE808                                           | 0.1401 |
| LEU799                                          | 0.1144 | LEU809                                           | 0.1298 |
| GLN800                                          | 0.1145 | GLU810                                           | 0.1127 |
| ILE801                                          | 0.1083 | ILE811                                           | 0.104  |
| SER802                                          | 0.1282 | SER812                                           | 0.1159 |
| LEU803                                          | 0.1108 | LEU813                                           | 0.1104 |
| THR804                                          | 0.0825 | THR814                                           | 0.0977 |
| GLU805                                          | 0.0802 | GLU815                                           | 0.0989 |
| ASN806                                          | 0.0971 | ASN816                                           | 0.109  |
| TRP807                                          | 0.0944 | TRP817                                           | 0.104  |
| LEU808                                          | 0.0837 | LEU818                                           | 0.095  |
| ILE809                                          | 0.0868 | ILE819                                           | 0.1059 |
| PHE810                                          | 0.1024 | PHE820                                           | 0.1198 |
| ILE811                                          | 0.1072 | ILE821                                           | 0.1124 |

|        |        |        |        |
|--------|--------|--------|--------|
| THR812 | 0.0935 | THR822 | 0.104  |
| ARG813 | 0.111  | ARG823 | 0.0928 |
| ALA814 | 0.1249 | ALA824 | 0.0932 |
| ASN815 | 0.1081 | GLU825 | 0.0975 |
| GLY816 | 0.1151 | GLY826 | 0.1115 |
| PRO817 | 0.1076 | PRO827 | 0.1208 |
| PHE818 | 0.1032 | LEU828 | 0.1235 |
| TRP819 | 0.117  | TRP829 | 0.1458 |
| SER820 | 0.1395 | SER830 | 0.1309 |
| SER821 | 0.1887 | SER831 | 0.2081 |
| ILE822 | 0.1284 | VAL832 | 0.2289 |

| <i>Neurospora crassa</i> H <sup>+</sup> -ATPase |        | <i>Aspergillus oryzae</i> H <sup>+</sup> -ATPase |        |
|-------------------------------------------------|--------|--------------------------------------------------|--------|
| Residue                                         | RMSF   | Residue                                          | RMSF   |
| PRO823                                          | 0.128  | PRO833                                           | 0.203  |
| SER824                                          | 0.1182 | SER834                                           | 0.1908 |
| TRP825                                          | 0.1195 | TRP835                                           | 0.2005 |
| GLN826                                          | 0.0993 | GLN836                                           | 0.17   |
| LEU827                                          | 0.0955 | LEU837                                           | 0.152  |
| SER828                                          | 0.1087 | THR838                                           | 0.1756 |
| GLY829                                          | 0.1055 | GLY839                                           | 0.1797 |
| ALA830                                          | 0.0974 | ALA840                                           | 0.1521 |
| ILE831                                          | 0.1029 | ILE841                                           | 0.1464 |
| PHE832                                          | 0.1138 | LEU842                                           | 0.169  |
| LEU833                                          | 0.1129 | VAL843                                           | 0.1696 |
| VAL834                                          | 0.1058 | VAL844                                           | 0.1485 |
| ASP835                                          | 0.1168 | ASP845                                           | 0.1759 |
| ILE836                                          | 0.13   | LEU846                                           | 0.2328 |
| LEU837                                          | 0.1222 | MET847                                           | 0.2158 |
| ALA838                                          | 0.1191 | ALA848                                           | 0.1527 |
| THR839                                          | 0.1395 | THR849                                           | 0.1827 |
| CYS840                                          | 0.1705 | PHE850                                           | 0.2213 |
| PHE841                                          | 0.1651 | PHE851                                           | 0.2048 |
| THR842                                          | 0.163  | CYS852                                           | 0.1796 |
| ILE843                                          | 0.1896 | LEU853                                           | 0.1973 |
| TRP844                                          | 0.2341 | PHE854                                           | 0.2163 |
| GLY845                                          | 0.2401 | GLY855                                           | 0.2454 |
| TRP846                                          | 0.263  | TRP856                                           | 0.2296 |
| PHE847                                          | 0.2203 | PHE857                                           | 0.23   |
| GLU848                                          | 0.328  | VAL858                                           | 0.2958 |
| HIS849                                          | 0.343  | GLY859                                           | 0.3197 |
| SER850                                          | 0.1853 | GLY860                                           | 0.3222 |
| ASP851                                          | 0.2291 | GLN861                                           | 0.3524 |
| THR852                                          | 0.2075 | THR862                                           | 0.3742 |

|        |        |        |        |
|--------|--------|--------|--------|
| SER853 | 0.1788 | SER863 | 0.3793 |
| ILE854 | 0.1646 | ILE864 | 0.2464 |
| VAL855 | 0.1726 | VAL865 | 0.2382 |
| ALA856 | 0.1682 | THR866 | 0.228  |
| VAL857 | 0.1547 | VAL867 | 0.1761 |
| VAL858 | 0.1549 | VAL868 | 0.1845 |
| ARG859 | 0.1557 | ARG869 | 0.1469 |
| ILE860 | 0.1322 | THR870 | 0.1334 |
| TRP861 | 0.153  | TRP871 | 0.1809 |
| ILE862 | 0.1472 | VAL872 | 0.1957 |
| PHE863 | 0.105  | PHE873 | 0.2175 |
| SER864 | 0.1138 | SER874 | 0.2179 |
| PHE865 | 0.1197 | ILE875 | 0.1665 |
| GLY866 | 0.1165 | GLY876 | 0.1652 |

| <i>Neurospora crassa</i> H <sup>+</sup> -ATPase |        | <i>Aspergillus oryzae</i> H <sup>+</sup> -ATPase |        |
|-------------------------------------------------|--------|--------------------------------------------------|--------|
| Residue                                         | RMSF   | Residue                                          | RMSF   |
| ILE867                                          | 0.1014 | VAL877                                           | 0.1776 |
| PHE868                                          | 0.0978 | PHE878                                           | 0.1782 |
| CYS869                                          | 0.1107 | CYS879                                           | 0.1634 |
| ILE870                                          | 0.109  | VAL880                                           | 0.1434 |
| MET871                                          | 0.0993 | MET881                                           | 0.1441 |
| GLY872                                          | 0.1089 | GLY882                                           | 0.198  |
| GLY873                                          | 0.1284 | GLY883                                           | 0.1904 |
| VAL874                                          | 0.134  | LEU884                                           | 0.1334 |
| TYR875                                          | 0.1197 | TYR885                                           | 0.1087 |
| TYR876                                          | 0.1178 | TYR886                                           | 0.1218 |
| ILE877                                          | 0.1327 | LEU887                                           | 0.1254 |
| LEU878                                          | 0.1342 | LEU888                                           | 0.1331 |
| GLN879                                          | 0.1451 | GLN889                                           | 0.1276 |
| ASP880                                          | 0.1485 | ASP890                                           | 0.1393 |
| SER881                                          | 0.182  | SER891                                           | 0.1249 |
| VAL882                                          | 0.1936 | LYS892                                           | 0.1331 |
| GLY883                                          | 0.2012 | GLY893                                           | 0.1617 |
| PHE884                                          | 0.1793 | PHE894                                           | 0.1888 |
| ASP885                                          | 0.1433 | ASP895                                           | 0.1878 |
| ASN886                                          | 0.1424 | ASN896                                           | 0.1919 |
| LEU887                                          | 0.1649 | ILE897                                           | 0.2434 |
| MET888                                          | 0.1512 | MET898                                           | 0.2714 |
| HIS889                                          | 0.166  | ASN899                                           | 0.3058 |
| GLY890                                          | 0.1973 | GLY900                                           | 0.331  |
| LYS891                                          | 0.2296 | ARG901                                           | 0.3551 |
| SER892                                          | 0.1941 | TRP902                                           | 0.3515 |
| PRO893                                          | 0.2457 | PRO903                                           | 0.448  |

|        |        |        |        |
|--------|--------|--------|--------|
| LYS894 | 0.2239 | GLY904 | 0.476  |
| GLY895 | 0.2282 | SER905 | 0.4493 |
| ASN896 | 0.1972 | LYS906 | 0.3403 |
| -      |        | ALA907 | 0.3317 |
| GLN897 | 0.1794 | SER908 | 0.3918 |
| LYS898 | 0.1633 | ARG909 | 0.3634 |
| GLN899 | 0.1558 | GLN910 | 0.2814 |
| ARG900 | 0.1507 | ARG911 | 0.3197 |
| SER901 | 0.1401 | GLN912 | 0.3983 |
| LEU902 | 0.1305 | LYS913 | 0.3678 |
| GLU903 | 0.1459 | GLU914 | 0.3132 |
| ASP904 | 0.1536 | ASP915 | 0.3321 |
| PHE905 | 0.1342 | PHE916 | 0.2897 |
| VAL906 | 0.1327 | VAL917 | 0.2908 |
| VAL907 | 0.1741 | VAL918 | 0.3395 |
| SER908 | 0.1831 | SER919 | 0.3455 |
| LEU909 | 0.1578 | MET920 | 0.2751 |

| <i>Neurospora crassa</i> H <sup>+</sup> -ATPase |        | <i>Aspergillus oryzae</i> H <sup>+</sup> -ATPase |        |
|-------------------------------------------------|--------|--------------------------------------------------|--------|
| Residue                                         | RMSF   | Residue                                          | RMSF   |
| GLN910                                          | 0.1258 | GLN921                                           | 0.2217 |
| ARG911                                          | 0.1348 | ARG922                                           | 0.2469 |
| VAL912                                          | 0.1733 | THR923                                           | 0.2059 |
| SER913                                          | 0.228  | SER924                                           | 0.1583 |
| THR914                                          | 0.2806 | THR925                                           | 0.1254 |
| GLN915                                          | 0.4047 | LEU926                                           | 0.1619 |
| HIS916                                          | 0.4698 | HIS927                                           | 0.1806 |
| GLU917                                          | 0.6357 | GLU928                                           | 0.2099 |
| LYS918                                          | 0.7407 | LYS929                                           | 0.289  |
| SER919                                          | 0.85   | SER930                                           | 0.4046 |
